# Supplementary material
Source: PubMed Central journal article supplement (PMC5684873)

**Supplement to: Comparison of Genome Sequencing and Clinical Genotyping for Pharmacogenes**

Wenjian Yang<sup>1</sup>, Gang Wu<sup>2</sup>, Ulrich Broeckel<sup>3</sup>, Colton A Smith<sup>1</sup>, Victoria Turner<sup>4</sup>, Cyrine E Haidar<sup>1</sup>, Shuoguo Wang<sup>2</sup>, Robert Carter<sup>2</sup>, Seth E. Karol<sup>1</sup>, Geoffrey Neale,<sup>5</sup> Kristine R. Crews,<sup>1</sup> Jun J Yang<sup>1</sup>, Charles G Mullighan<sup>4</sup>, James R Downing<sup>4</sup>, William E Evans<sup>1</sup>, Mary V Relling<sup>1</sup>

<sup>1</sup>Departments of Pharmaceutical Sciences, <sup>2</sup>Computational Biology, <sup>4</sup>Pathology, <sup>5</sup>Hartwell Center, St. Jude Children's Research Hospital, 262 Danny Thomas Place, Memphis, TN 38105, USA.

<sup>3</sup>Human and Molecular Genetics Center, Medical College of Wisconsin, Milwaukee, WI 53226, USA.

Correspondence to Dr. Mary V. Relling, St. Jude Children's Research Hospital, 262 Danny

Thomas Place, Memphis, TN 38105, USA. Phone: (901) 595-2348; Fax: (901) 595-8869; e-mail:

mary.relling@stjude.org

## Supplemental Materials

### ***CYP2D6* copy number and allele composition**

One characteristic of WES is that for patients with *CYP2D6* duplications, one may deduce which *CYP2D6* allele was duplicated by examining the ratio of read counts between reference and alternative genotypes (Supplemental Table 3, Supplemental Figure 6). Among patients who had heterozygous genotypes at any *CYP2D6* SNV/indel, the read count ratios between reference allele and alternative allele observed in patients with gene duplications should differ from those observed in patients with two copies of the gene: i.e. 2 (Refx2/Alt) or 0.5 (Ref/Alt<sub>x2</sub>) for those with a duplicated allele vs. 1 (Ref/Alt) for those with no duplication. For example, there were three patients with *CYP2D6* duplications (CN=3) who also had heterozygous genotypes at variant positions *CYP2D6*\*2 (R296C and S486T) (Supplemental Table 3). By examining the read count ratio, we could determine that one patient was \*1x2/\*2 while two patients were \*1/\*2x2. Additionally, we examined the read count ratios in the two duplications that were called by WES but not by clinical qPCR. In both of these cases, the read count ratios could not be differentiated from those in patients with two copies of *CYP2D6*. Therefore, it is possible that by effectively analyzing read count ratios among heterozygous loci, one could further refine the copy number estimation by WES.

## Table Legends

Supplemental Table 1: CPIC important variants interrogated (n=127)

Supplemental Table 2: Genotyping call rates, minor allele frequency (MAF), p value for Hardy-Weinberg Equilibrium (HWE) within patients of > 90% European ancestry, and average read depth for WES and WGS for CPIC important SNV/indel variants by DMET, WES and WGS (n=124 variants). *CYP2D6\*5*, *CYP2D6/CYP2D7* and *HLA-B* are not included. For concordance, the number of patients evaluable by each of the two method comparisons is listed, and concordance is listed in the format of “a/b(c)”, where “a” is the number of discrepant genotypes, “b” is the number of concordant genotypes and “c” is the number of concordant non-reference genotypes. NA = not applicable (variant not ascertained by one or both methods).

Supplemental Table 3. Inferred haplotype composition in patients with *CYP2D6* duplication. Shown are log<sub>2</sub>-transformed read depth ratios in patients with heterozygous genotypes and with polyploid *CYP2D6* copy number as determined by either WES or qPCR. The read depth ratios are defined as the ratio of number of reads with alternative allele over number of reads with reference allele. Among patients with diploid *CYP2D6* copy numbers, the log transformed read depth ratios are within -0.6 to 0.6 except for chr22:42526694 (P34S) (Supplemental Figure 6). In all five patients with consistent *CYP2D6* duplication by both WES and CNV (patient #1-#5), we can definitively infer their haplotype compositions. In two patients with conflicting WES and qPCR CNVs (#6 and 7), the WES read depth ratios do not support duplication as inferred byXHMM. In the other three patients (#8-10), the WES read ratios also yield ambiguity, which suggests the possible presence of a *CYP2D6/CYP2D7* hybrid. Hom\_Ref and Hom\_Alt indicate that the patient’s DNA was homozygous for the reference or alternative allele, respectively at that variant. WES and qPCR CNV indicate the number of copies of *CYP2D6* estimated using WES vs using qPCR methods, respectively.

Supplemental Table 4. Coverage of coding regions of CPIC important genes by WES. \*WES or WGS coverage of exonic region is calculated as % of exonic nucleotides that were interrogated at  $\geq 10\times$  in 95% of patients. *UGT1A1* data is based on the first exon that is unique to *UGT1A1*.

Supplemental Table 5. Coverage of exonic regions of CPIC important genes by WES or WGS by exon.

Supplemental Table 6. Coding variants discovered by WES or WGS that were not included among CPIC important variants. 6A). Coding variants discovered by WES that were not included among CPIC important variants. ExonicFunc.refGene and AA.Change (amino acid substitution) are based on annotation from Refseq release 69 (genome assembly GRCh37/hg19) ; snp138 provides the rs ID number for each variant based on build 138 of dbSNP; ExAC.maf is the minor allele frequency among all samples (multiple races) based on <http://exac.broadinstitute.org/> (version 0.3); CADD Score is the estimated Combined Annotation Dependent Depletion score based on <http://cadd.gs.washington.edu/> (v1.3), higher CADD score indicate possible damaging variants. 6B). Coding variants discovered by WGS that were not included among CPIC important variants.

Supplemental Table 7. Number of coding variations observed in exomes of unrelated individuals (n=60,706) in CPIC important genes as reported by ExAC database (<http://exac.broadinstitute.org/> version 0.3). Listed are 12 CPIC important genes (excluding *HLA-B*) and all coding variants reported by ExAC, including CPIC important variants. Loss of function variants include “stop gained” and “frameshift” variants.

#### Figure Legends:

Supplemental Figure 1. Workflow comparing WES and DMET genotyping for CPIC important variants

Supplemental Figure 2: Workflow comparing WGS and DMET genotyping for CPIC important variants

Supplemental Figure 3. Allele frequencies observed in our cohort interrogated by A) WES (n= 51 variants) or B) WGS (n=40 variants) compared with allele frequencies reported in ExAC database (<http://exac.broadinstitute.org/> version 0.3). Allele frequencies shown are in subjects with European ancestry only.

Supplemental Figure 4. Minor allele fraction (based on sequencing reads) distribution among heterozygous genotypes in our cohort interrogated by A) WES and B) WGS. Histogram shows minor allele fraction (MAFrac) in heterozygous calls generated by WES and WGS that were in concordance with DMET genotypes. All discordant genotypes had lower MAFrac by sequencing (marked by unshaded bars).

Supplemental Figure 5. *HLA-B* haplotypes determined by WES compared with clinical molecular assays and WGS. Arcs of same color indicate concordant genotyping results. Arcs of different colors indicate discordant calls. The actionable *HLA-B* variants \*5801 and \*5701 are highlighted. 5A. *HLA-B* haplotypes inferred using WES and clinical molecular assays (n=66). 5B. *HLA-B* haplotypes inferred using WGS and clinical molecular assays (n=16).

Supplemental Figure 6. Distribution of read depth ratios of heterozygous genotypes among patients with diploid *CYP2D6* copy numbers. Shown are distributions of read depth ratios defined as the ratio of number of reads with alternative allele over number of reads with reference allele. The read depth ratios were log<sub>2</sub> transformed. Only patients who were heterozygous at the SNVs and also had diploid *CYP2D6* as determined by both WES and qPCR were included. Shown are 4 representative *CYP2D6* SNVs with highest minor allele frequencies among 83 patients with diploid *CYP2D6* copy numbers. All show narrow range between -0.6 and 0.6, except for chr22:42526694(P34S).

Supplemental Figure 7. Coverage of coding regions by gene by WES and WGS. Solid line indicates median coverage at each base (n=636 patients). Dotted line indicate the 5<sup>th</sup> percentile of coverage, i.e.

95% of samples have coverage above the dotted line. Red horizontal line indicates 10X coverage. For *G6PD*, green are males and blue are females.

Supplemental Figure 8. Coverage of coding regions by gene by WGS. Solid line indicates median coverage at each base (n=68 patients). Dotted line indicate the 5<sup>th</sup> percentile of coverage, i.e. 95% of samples have coverage above the dotted line. Red horizontal line indicates 10X coverage. For *G6PD*, green are males and blue are females.

Supplemental Figure 9. Aligned reads from a patients carrying *CYP2D6*\*20 T>TC variant using WGS. Display was centered at *CYP2D6*\*20 (chr22:42524819). "C" in red indicates reads with insertion T>TC at this position comparing with reference genome as indicated by ".". All reads with "TC" at this position also have multiple non-reference genotypes (nucleotides in red). This suggests the sequences with "TC" likely align to *CYP2D6* paralog.

Supplemental Table 1: CPIC important variants interrogated (n=127)

| Gene           | Alias        | dbSNP ID    | Variant Type | chr.pos (hg19) | SNV.func         | Contributing to Starred Alleles |
|----------------|--------------|-------------|--------------|----------------|------------------|---------------------------------|
| <i>CFTR</i>    | G178R        | rs80282562  | SNV          | chr7:117174372 | missense         |                                 |
| <i>CFTR</i>    | F508del(TCT) | rs199826652 | indel        | chr7:117199645 | inframe_deletion |                                 |
| <i>CFTR</i>    | F508del(CTT) | rs113993960 | indel        | chr7:117199646 | inframe_deletion |                                 |
| <i>CFTR</i>    | S549R(A>C)   | rs121908757 | SNV          | chr7:117227853 | missense         |                                 |
| <i>CFTR</i>    | S549N        | rs121908755 | SNV          | chr7:117227854 | missense         |                                 |
| <i>CFTR</i>    | S549R(T>G)   | rs121909005 | SNV          | chr7:117227855 | missense         |                                 |
| <i>CFTR</i>    | G551S        | rs121909013 | SNV          | chr7:117227859 | missense         |                                 |
| <i>CFTR</i>    | G551D        | rs75527207  | SNV          | chr7:117227860 | missense         |                                 |
| <i>CFTR</i>    | G1244E       | rs267606723 | SNV          | chr7:117282505 | missense         |                                 |
| <i>CFTR</i>    | S1251N       | rs74503330  | SNV          | chr7:117282526 | missense         |                                 |
| <i>CFTR</i>    | S1255P       | rs121909041 | SNV          | chr7:117282537 | missense         |                                 |
| <i>CFTR</i>    | G1349D       | rs193922525 | SNV          | chr7:117304824 | missense         |                                 |
| <i>CYP2C19</i> | -806C>T      | rs12248560  | SNV          | chr10:96521657 | upstream_gene    | *17                             |
| <i>CYP2C19</i> | M1V          | rs28399504  | SNV          | chr10:96522463 | start_lost       | *4                              |
| <i>CYP2C19</i> | W120R        | rs41291556  | SNV          | chr10:96535173 | missense         | *8                              |
| <i>CYP2C19</i> | R132Q        | rs72552267  | SNV          | chr10:96535210 | missense         | *6                              |
| <i>CYP2C19</i> | W212X        | rs4986893   | SNV          | chr10:96540410 | stop_gained      | *3                              |
| <i>CYP2C19</i> | P227P        | rs4244285   | SNV          | chr10:96541616 | synonymous       | *2                              |
| <i>CYP2C19</i> | 19294T>A     | rs72558186  | SNV          | chr10:96541756 | splice_donor     | *7                              |
| <i>CYP2C19</i> | R433W        | rs56337013  | SNV          | chr10:96612495 | missense         | *5                              |
| <i>CYP2C9</i>  | L90P         | rs72558187  | SNV          | chr10:96701715 | missense         | *13                             |
| <i>CYP2C9</i>  | 3531_3540del | rs72558188  | indel        | chr10:96701970 | frameshift       | *25                             |
| <i>CYP2C9</i>  | R144C        | rs1799853   | SNV          | chr10:96702047 | missense         | *2, *24, *35                    |
| <i>CYP2C9</i>  | R150H        | rs7900194   | SNV          | chr10:96702066 | missense         | *8, *27                         |
| <i>CYP2C9</i>  | S162X        | rs72558190  | SNV          | chr10:96707539 | stop_gained      | *15                             |

|        |                   |                |           |                    |                |                                                                                                  |
|--------|-------------------|----------------|-----------|--------------------|----------------|--------------------------------------------------------------------------------------------------|
| CYP2C9 | 10601delA         | rs9332131      | indel     | chr10:96709039     | frameshift     | *6                                                                                               |
| CYP2C9 | I327T             | rs57505750     | SNV       | chr10:96740958     | missense       | *31                                                                                              |
| CYP2C9 | R335W             | rs28371685     | SNV       | chr10:96740981     | missense       | *11                                                                                              |
| CYP2C9 | I359L             | rs1057910      | SNV       | chr10:96741053     | missense       | *3, *18                                                                                          |
| CYP2C9 | I359T             | rs56165452     | SNV       | chr10:96741054     | missense       | *4                                                                                               |
| CYP2C9 | D360E             | rs28371686     | SNV       | chr10:96741058     | missense       | *5                                                                                               |
| CYP2C9 | P489S             | rs9332239      | SNV       | chr10:96748777     | missense       | *12                                                                                              |
| CYP2D6 | CYP2D6/2D7 hybrid | Not applicable | structure | CYP2D6 gene region | geneconversion |                                                                                                  |
| CYP2D6 | *5                | Not applicable | structure | CYP2D6 gene region | copynumber     |                                                                                                  |
| CYP2D6 | S486T             | rs1135840      | SNV       | chr22:42522613     | missense       | *2, *4, *10                                                                                      |
| CYP2D6 | 468_470dupVPT     | rs765776661    | indel     | chr22:42522660     | inframe        | *18                                                                                              |
| CYP2D6 | R441C             | rs730882171    | SNV       | chr22:42522749     | missense       | *62                                                                                              |
| CYP2D6 | R440H             | rs267608319    | SNV       | chr22:42522751     | missense       | *31                                                                                              |
| CYP2D6 | K404Q             | rs267608285    | SNV       | chr22:42522958     | missense       | *55                                                                                              |
| CYP2D6 | E383K             | rs75386357     | SNV       | chr22:42523475     | missense       | *72                                                                                              |
| CYP2D6 | 3259insGT         | rs72549346     | indel     | chr22:42523533     | frameshift     | *42                                                                                              |
| CYP2D6 | R344X             | rs147960066    | SNV       | chr22:42523592     | stop_gained    | *56                                                                                              |
| CYP2D6 | V338M             | rs59421388     | SNV       | chr22:42523610     | missense       | *29                                                                                              |
| CYP2D6 | E334A             | rs72549348     | SNV       | chr22:42523621     | missense       | *51                                                                                              |
| CYP2D6 | 2988G>A           | rs28371725     | SNV       | chr22:42523805     | intron         | *41, *69                                                                                         |
| CYP2D6 | 2950G>C           | rs72549349     | SNV       | chr22:42523843     | splice_donor   | *44                                                                                              |
| CYP2D6 | 2927_2945ins      | rs730882170    | indel     | chr22:42523846     | frameshift     | *101                                                                                             |
| CYP2D6 | H324P             | rs5030867      | SNV       | chr22:42523858     | missense       | *7                                                                                               |
| CYP2D6 | R296C             | rs16947        | SNV       | chr22:42523943     | missense       | *2, *8, *11, *12, *14, *17, *19, *20, *21, *29, *31, *40, *41, *42, *45, *51, *55, *56, *59, *69 |

|        |               |             |       |                |                 |                                                                  |
|--------|---------------|-------------|-------|----------------|-----------------|------------------------------------------------------------------|
| CYP2D6 | 2828C>del     | rs267608279 | indel | chr22:42523965 | frameshift      | *100                                                             |
| CYP2D6 | 2615delAAG    | rs5030656   | indel | chr22:42524178 | splice_region   | *9                                                               |
| CYP2D6 | 2587delGACT   | rs72549351  | indel | chr22:42524203 | frameshift      | *38                                                              |
| CYP2D6 | 2573_2574insC | rs267608296 | indel | chr22:42524220 | frameshift      | *21                                                              |
| CYP2D6 | T261I         | rs267608297 | SNV   | chr22:42524237 | missense        | *54                                                              |
| CYP2D6 | R259X         | rs35742686  | indel | chr22:42524244 | frameshift      | *3                                                               |
| CYP2D6 | 2539delAACT   | rs72549353  | indel | chr22:42524251 | frameshift      | *19                                                              |
| CYP2D6 | 2291G>A       | rs267608300 | SNV   | chr22:42524502 | intron          | *59                                                              |
| CYP2D6 | L213P         | rs199535154 | SNV   | chr22:42524814 | missense        | *20                                                              |
| CYP2D6 | 1973insG      | rs72549354  | indel | chr22:42524819 | frameshift      | *20                                                              |
| CYP2D6 | 1863_1864ins  | rs72549356  | indel | chr22:42524929 | inframe         | *40                                                              |
| CYP2D6 | 1846G>A       | rs3892097   | SNV   | chr22:42524947 | splice_acceptor | *4                                                               |
| CYP2D6 | G169RorX      | rs5030865   | SNV   | chr22:42525035 | stop_gained     | *8, *14                                                          |
| CYP2D6 | E156A         | rs267608302 | SNV   | chr22:42525080 | missense        | *50                                                              |
| CYP2D6 | W152X         | rs5030655   | indel | chr22:42525086 | frameshift      | *6                                                               |
| CYP2D6 | V136I         | rs61736512  | SNV   | chr22:42525134 | missense        | *29                                                              |
| CYP2D6 | F120I         | rs1135822   | SNV   | chr22:42525182 | missense        | *49                                                              |
| CYP2D6 | T107I         | rs28371706  | SNV   | chr22:42525772 | missense        | *17, *40                                                         |
| CYP2D6 | 883G>C        | rs201377835 | SNV   | chr22:42525912 | splice_acceptor | *11                                                              |
| CYP2D6 | R62W          | rs267608311 | SNV   | chr22:42525917 | missense        | *57                                                              |
| CYP2D6 | 137insT       | rs72549357  | indel | chr22:42526657 | frameshift      | *15                                                              |
| CYP2D6 | G42R          | rs5030862   | SNV   | chr22:42526670 | missense        | *12                                                              |
| CYP2D6 | P34S          | rs1065852   | SNV   | chr22:42526694 | missense        | *4, *10, *14A,<br>*36, *47, *49,<br>*56, *57, *69,<br>*100, *101 |
| CYP2D6 | R25W          | rs267608313 | SNV   | chr22:42526721 | missense        | *47                                                              |
| CYP3A5 | 27131insT     | rs41303343  | indel | chr7:99250393  | frameshift      | *7                                                               |



|                |               |                |           |                          |               |         |
|----------------|---------------|----------------|-----------|--------------------------|---------------|---------|
| <i>CYP3A5</i>  | 14690G>A      | rs10264272     | SNV       | chr7:99262835            | synonymous    | *6      |
| <i>CYP3A5</i>  | 6986A>G       | rs776746       | SNV       | chr7:99270539            | intron        | *3      |
| <i>DPYD</i>    | V995F         | rs1801268      | SNV       | chr1:97544627            | missense      | *10     |
| <i>DPYD</i>    | rs67376798T   | rs67376798     | SNV       | chr1:97547947            | missense      |         |
| <i>DPYD</i>    | R886H         | rs1801267      | SNV       | chr1:97564154            | missense      | *9B     |
| <i>DPYD</i>    | c.1905+1G>A   | rs3918290      | SNV       | chr1:97915614            | splice_donor  | *2A     |
| <i>DPYD</i>    | P633X         | rs72549303     | indel     | chr1:97915622            | frameshift    | *3      |
| <i>DPYD</i>    | I560S         | rs55886062     | SNV       | chr1:97981343            | missense      | *13     |
| <i>DPYD</i>    | E386X         | rs78060119     | SNV       | chr1:98039499            | stop_gained   | *12     |
| <i>DPYD</i>    | V335L         | rs72549306     | SNV       | chr1:98058899            | missense      | *11     |
| <i>DPYD</i>    | R235W         | rs1801266      | SNV       | chr1:98157332            | missense      | *8      |
| <i>DPYD</i>    | c.295delTCAT  | rs72549309     | indel     | chr1:98205971            | frameshift    | *7      |
| <i>DPYD</i>    | C29R          | rs1801265      | SNV       | chr1:98348885            | missense      | *9B,*9A |
| <i>DPYD</i>    | R21Q          | rs80081766     | SNV       | chr1:98348908            | missense      | *12     |
| <i>G6PD</i>    | Canton        | rs72554665     | SNV       | chrX:153760484           | missense      |         |
| <i>G6PD</i>    | Chatham       | rs5030869      | SNV       | chrX:153761205           | missense      |         |
| <i>G6PD</i>    | Kalyan        | rs137852339    | SNV       | chrX:153761259           | missense      |         |
| <i>G6PD</i>    | Mediterranean | rs5030868      | SNV       | chrX:153762634           | missense      |         |
| <i>G6PD</i>    | A-            | rs1050829      | SNV       | chrX:153763492           | missense      |         |
| <i>G6PD</i>    | Asahi         | rs1050828      | SNV       | chrX:153764217           | missense      |         |
| <i>G6PD</i>    | Orissa        | rs78478128     | SNV       | chrX:153764383           | missense      |         |
| <i>HLA-B</i>   | Haplotype     | Not applicable | haplotype | <i>HLA-B</i> gene region | haplotype     |         |
| <i>IFNL3</i>   | rs12979860    | rs12979860     | SNV       | chr19:39738787           | upstream_gene |         |
| <i>IFNL3</i>   | rs8099917     | rs8099917      | SNV       | chr19:39743165           | upstream_gene |         |
| <i>SLCO1B1</i> | c.-11187G>A   | rs4149015      | SNV       | chr12:21283322           | upstream_gene | *17     |
| <i>SLCO1B1</i> | G71R          | rs373327528    | SNV       | chr12:21325710           | missense      | *23     |
| <i>SLCO1B1</i> | F73L          | rs56101265     | SNV       | chr12:21325716           | missense      | *2      |

|                |            |                   |       |                |                 |                                |
|----------------|------------|-------------------|-------|----------------|-----------------|--------------------------------|
| <i>SLCO1B1</i> | V82A       | rs56061388        | SNV   | chr12:21327529 | missense        | *3                             |
| <i>SLCO1B1</i> | N130D      | rs2306283         | SNV   | chr12:21329738 | missense        | *5, *14, *15,<br>*17, *31, *35 |
| <i>SLCO1B1</i> | P155T      | rs11045819        | SNV   | chr12:21329813 | missense        | *14                            |
| <i>SLCO1B1</i> | E156G      | rs72559745        | SNV   | chr12:21329817 | missense        | *3                             |
| <i>SLCO1B1</i> | V174A      | rs4149056         | SNV   | chr12:21331549 | missense        | *5, *15, *17                   |
| <i>SLCO1B1</i> | I353T      | rs55901008        | SNV   | chr12:21353529 | missense        | *6                             |
| <i>SLCO1B1</i> | G488A      | rs59502379        | SNV   | chr12:21358933 | missense        | *31                            |
| <i>SLCO1B1</i> | L643F      | rs34671512        | SNV   | chr12:21391976 | missense        | *35                            |
| <i>SLCO1B1</i> | D655G      | rs56199088        | SNV   | chr12:21392011 | missense        | *10                            |
| <i>TPMT</i>    | Y240C      | rs1142345         | SNV   | chr6:18130918  | missense        | *3C, *3A                       |
| <i>TPMT</i>    | R215H      | rs56161402        | SNV   | chr6:18130993  | missense        | *8                             |
| <i>TPMT</i>    | c.626-1G>A | rs1800584         | SNV   | chr6:18131012  | splice_acceptor | *4                             |
| <i>TPMT</i>    | Y180F      | rs75543815        | SNV   | chr6:18134076  | missense        | *6                             |
| <i>TPMT</i>    | R163H      | rs144041067       | SNV   | chr6:18139200  | missense        | *16                            |
| <i>TPMT</i>    | A154T      | rs1800460         | SNV   | chr6:18139228  | missense        | *3B, *3A                       |
| <i>TPMT</i>    | G144R      | rs72552737        | SNV   | chr6:18139258  | missense        | *10                            |
| <i>TPMT</i>    | C132Y      | rs72552738        | SNV   | chr6:18139920  | missense        | *11                            |
| <i>TPMT</i>    | S125L      | rs200220210       | SNV   | chr6:18139941  | missense        | *12                            |
| <i>TPMT</i>    | K119T      | rs151149760       | SNV   | chr6:18143837  | missense        | *9                             |
| <i>TPMT</i>    | A80P       | rs1800462         | SNV   | chr6:18143955  | missense        | *2                             |
| <i>TPMT</i>    | G71R       | <i>TPMT</i> _ *18 | SNV   | chr6:18148076  | missense        | *18                            |
| <i>TPMT</i>    | L49S       | rs72552740        | SNV   | chr6:18148141  | missense        | *5                             |
| <i>TPMT</i>    | Q42E       | <i>TPMT</i> _ *17 | SNV   | chr6:18149235  | missense        | *17                            |
| <i>TPMT</i>    | E28V       | rs72552742        | SNV   | chr6:18149276  | missense        | *13                            |
| <i>UGT1A1</i>  | *28        | rs8175347         | indel | chr2:234668881 | upstream_gene   | *28                            |
| <i>VKORC1</i>  | -1639G>A   | rs9923231         | SNV   | chr16:31107689 | upstream_gene   |                                |

Supplemental Table 2: Genotyping call rates, minor allele frequency (MAF), p value for Hardy-Weinberg Equilibrium (HWE) within patients of > 90% European ancestry, and average read depth for WES and WGS for CPIC important SNV/indel variants by DMET, WES and WGS (n=124 variants). *CYP2D6\*5*, *CYP2D6/CYP2D7* and *HLA-B* are not included. For concordance, the number of patients evaluable by each of the two method comparisons is listed, and concordance is listed in the format of “a/b(c)”, where “a” is the number of discrepant genotypes, “b” is the number of concordant genotypes and “c” is the number of concordant non-reference genotypes. NA = not applicable (variant not ascertained by one or both methods).

| Gene           | Alias        | DMET (n=2656) |       |             | WES (n=636) |       |             |                    | WGS (n=68) |       |             |                    | Concordance          |                     |                    |
|----------------|--------------|---------------|-------|-------------|-------------|-------|-------------|--------------------|------------|-------|-------------|--------------------|----------------------|---------------------|--------------------|
|                |              | Call rate     | MAF   | HWE P-value | Call rate   | MAF   | HWE P-value | Average read depth | Call rate  | MAF   | HWE P-value | Average read depth | WES vs. DMET (n=176) | WGS vs. DMET (n=68) | WES vs. WGS (n=16) |
| <i>CFTR</i>    | G178R        | NA            | NA    | NA          | 1           | 0     | 1           | 23.2               | 1          | 0     | 1           | 36.8               | NA                   | NA                  | 0/16(0)            |
| <i>CFTR</i>    | F508del(TCT) | NA            | NA    | NA          | 0.998       | 0.01  | 1           | 19                 | 1          | 0     | 1           | 37.4               | NA                   | NA                  | 0/16(0)            |
| <i>CFTR</i>    | F508del(CTT) | NA            | NA    | NA          | 0.998       | 0     | 1           | 18.7               | 1          | 0     | 1           | 37.5               | NA                   | NA                  | 0/16(0)            |
| <i>CFTR</i>    | S549R(A>C)   | NA            | NA    | NA          | 1           | 0     | 1           | 25.6               | 1          | 0     | 1           | 36.1               | NA                   | NA                  | 0/16(0)            |
| <i>CFTR</i>    | S549N        | NA            | NA    | NA          | 1           | 0     | 1           | 25.6               | 1          | 0     | 1           | 37.2               | NA                   | NA                  | 0/16(0)            |
| <i>CFTR</i>    | S549R(T>G)   | NA            | NA    | NA          | 1           | 0     | 1           | 25.6               | 1          | 0     | 1           | 36.5               | NA                   | NA                  | 0/16(0)            |
| <i>CFTR</i>    | G551S        | NA            | NA    | NA          | 1           | 0     | 1           | 25.6               | 1          | 0     | 1           | 36.5               | NA                   | NA                  | 0/16(0)            |
| <i>CFTR</i>    | G551D        | NA            | NA    | NA          | 1           | 0.001 | 1           | 25.6               | 1          | 0     | 1           | 36.5               | NA                   | NA                  | 0/16(0)            |
| <i>CFTR</i>    | G1244E       | NA            | NA    | NA          | 1           | 0     | 1           | 22.2               | 1          | 0     | 1           | 36.6               | NA                   | NA                  | 0/16(0)            |
| <i>CFTR</i>    | S1251N       | NA            | NA    | NA          | 1           | 0     | 1           | 22.4               | 1          | 0     | 1           | 35                 | NA                   | NA                  | 0/16(0)            |
| <i>CFTR</i>    | S1255P       | NA            | NA    | NA          | 1           | 0     | 1           | 22.4               | 1          | 0     | 1           | 34.8               | NA                   | NA                  | 0/16(0)            |
| <i>CFTR</i>    | G1349D       | NA            | NA    | NA          | 1           | 0     | 1           | 22.8               | 1          | 0     | 1           | 31.3               | NA                   | NA                  | 0/16(0)            |
| <i>CYP2C19</i> | -806C>T      | 1             | 0.204 | 0.389       | NA          | NA    | NA          | NA                 | 1          | 0.184 | 1           | 35                 | NA                   | 0/68(22)            | NA                 |
| <i>CYP2C19</i> | M1V          | 1             | 0.001 | 1           | 1           | 0.001 | 1           | 24.1               | 1          | 0     | 1           | 35.7               | 0/176(0)             | 0/68(0)             | 0/16(0)            |
| <i>CYP2C19</i> | W120R        | 0.999         | 0.002 | 1           | 1           | 0.005 | 1           | 26.1               | 1          | 0.001 | 1           | 32.6               | 0/174(0)             | 0/68(0)             | 0/16(0)            |
| <i>CYP2C19</i> | R132Q        | 1             | 0     | 1           | 1           | 0     | 1           | 25.3               | 1          | 0     | 1           | 32.9               | 0/176(0)             | 0/68(0)             | 0/16(0)            |
| <i>CYP2C19</i> | W212X        | 1             | 0.002 | 1           | 0.995       | 0.005 | 1           | 17.6               | 1          | 0.008 | 1           | 38.5               | 0/176(2)             | 0/67(0)             | 0/16(0)            |
| <i>CYP2C19</i> | P227P        | 1             | 0.158 | 0.443       | 1           | 0.165 | 0.364       | 25.3               | 1          | 0.147 | 0.564       | 41.8               | 0/176(49)            | 0/68(20)            | 0/16(2)            |
| <i>CYP2C19</i> | 19294T>A     | 1             | 0     | 1           | 0.991       | 0     | 1           | 18.4               | 1          | 0     | 1           | 35.8               | 0/176(0)             | 0/68(0)             | 0/16(0)            |
| <i>CYP2C19</i> | R433W        | 0.996         | 0     | 1           | 1           | 0     | 1           | 27.4               | 1          | 0     | 1           | 37                 | 0/173(0)             | 0/67(0)             | 0/16(0)            |

|        |               |       |       |       |       |       |       |       |       |       |       |      |            |          |          |
|--------|---------------|-------|-------|-------|-------|-------|-------|-------|-------|-------|-------|------|------------|----------|----------|
| CYP2C9 | L90P          | 1     | 0     | 1     | 1     | 0     | 1     | 31.3  | 1     | 0     | 1     | 36.5 | 0/176(0)   | 0/68(0)  | 0/16(0)  |
| CYP2C9 | 3531_3540del  | 1     | 0     | 1     | 1     | 0     | 1     | 30.8  | 1     | 0     | 1     | 29.6 | 0/176(0)   | 0/68(0)  | 0/16(0)  |
| CYP2C9 | R144C         | 0.99  | 0.082 | 0.458 | 1     | 0.121 | 1     | 35.1  | 1     | 0.118 | 1     | 28.9 | 0/169(44)  | 0/63(14) | 0/16(4)  |
| CYP2C9 | R150H         | NA    | NA    | NA    | 1     | 0.01  | 1     | 25.7  | 1     | 0.022 | 1     | 29.2 | NA         | NA       | 0/16(1)  |
| CYP2C9 | S162X         | 1     | 0     | 1     | 0.998 | 0     | 1     | 19.6  | 1     | 0     | 1     | 38.4 | 0/176(0)   | 0/68(0)  | 0/16(0)  |
| CYP2C9 | 10601delA     | 1     | 0.004 | 1     | 0.998 | 0.002 | 1     | 20.9  | 1     | 0     | 1     | 31.7 | 0/176(0)   | 0/68(0)  | 0/16(0)  |
| CYP2C9 | I327T         | NA    | NA    | NA    | 0.986 | 0     | 1     | 14.9  | 1     | 0     | 1     | 33.1 | NA         | NA       | 0/16(0)  |
| CYP2C9 | R335W         | 1     | 0.01  | 1     | 0.992 | 0.007 | 1     | 17.4  | 1     | 0.002 | 1     | 30.6 | 0/176(3)   | 0/68(0)  | 0/16(0)  |
| CYP2C9 | I359L         | 0.999 | 0.04  | 0.013 | 1     | 0.043 | 0.613 | 23.3  | 1     | 0.052 | 1     | 30.1 | 0/176(14)  | 0/68(7)  | 0/16(2)  |
| CYP2C9 | I359T         | 1     | 0     | 1     | 1     | 0     | 1     | 22    | 1     | 0     | 1     | 29.8 | 0/176(0)   | 0/68(0)  | 0/16(0)  |
| CYP2C9 | D360E         | 0.999 | 0.005 | 1     | 1     | 0.002 | 1     | 22.2  | 1     | 0.008 | 1     | 30   | 0/176(1)   | 0/68(1)  | 0/16(1)  |
| CYP2C9 | P489S         | 1     | 0.001 | 1     | 1     | 0.006 | 1     | 26.7  | 1     | 0.001 | 1     | 33.2 | 0/176(3)   | 0/68(0)  | 0/16(0)  |
| CYP2D6 | S486T         | 0.994 | 0.409 | 1     | 0.998 | 0.436 | 0.105 | 146.5 | 1     | 0.418 | 0.192 | 28   | 0/175(104) | 0/67(41) | 0/16(7)  |
| CYP2D6 | 468_470dupVPT | 1     | 0     | 1     | 1     | 0     | 1     | 33.4  | 0.975 | 0.002 | 1     | 25   | 0/176(0)   | 0/68(0)  | 0/16(0)  |
| CYP2D6 | R441C         | NA    | NA    | NA    | 0.998 | 0.001 | 1     | 47    | 1     | 0     | 1     | 25.5 | NA         | NA       | 0/16(0)  |
| CYP2D6 | R440H         | NA    | NA    | NA    | 0.998 | 0     | 1     | 46.9  | 1     | 0     | 1     | 25.7 | NA         | NA       | 0/16(0)  |
| CYP2D6 | K404Q         | NA    | NA    | NA    | 0.998 | 0     | 1     | 47    | 1     | 0     | 1     | 26.3 | NA         | NA       | 0/16(0)  |
| CYP2D6 | E383K         | NA    | NA    | NA    | 1     | 0.001 | 1     | 118.2 | 1     | 0     | 1     | 26.9 | NA         | NA       | 0/16(0)  |
| CYP2D6 | 3259insGT     | 1     | 0.002 | 1     | 1     | 0.001 | 1     | 110.5 | 1     | 0     | 1     | 27.1 | 0/176(1)   | 0/68(0)  | 0/16(0)  |
| CYP2D6 | R344X         | 1     | 0.001 | 1     | 1     | 0     | 1     | 90.7  | 0.985 | 0     | 1     | 28.8 | 0/176(0)   | 0/68(0)  | 0/16(0)  |
| CYP2D6 | V338M         | 0.996 | 0.041 | 1     | 1     | 0.021 | 1     | 90.8  | 1     | 0.022 | 1     | 29.7 | 0/176(9)   | 0/67(3)  | 0/16(1)  |
| CYP2D6 | E334A         | NA    | NA    | NA    | 1     | 0     | 1     | 89.2  | 1     | 0     | 1     | 27.3 | NA         | NA       | 0/16(0)  |
| CYP2D6 | 2988G>A       | 1     | 0.065 | 0.324 | 0.995 | 0.096 | 0.817 | 42.1  | 1     | 0.09  | 1     | 26.5 | 0/176(33)  | 0/67(10) | 0/16(2)  |
| CYP2D6 | 2950G>C       | 1     | 0     | 1     | 0.994 | 0     | 1     | 41.9  | 0.985 | 0     | 1     | 26.3 | 0/176(0)   | 0/68(0)  | 0/16(0)  |
| CYP2D6 | 2927_2945ins  | NA    | NA    | NA    | 0.994 | 0     | 1     | 42    | 1     | 0     | 1     | 24.7 | NA         | NA       | 0/16(0)  |
| CYP2D6 | H324P         | 0.999 | 0.001 | 1     | 0.997 | 0.001 | 1     | 42.4  | 0.985 | 0.001 | 1     | 26.6 | 0/176(0)   | 0/68(0)  | 0/16(0)  |
| CYP2D6 | R296C         | 1     | 0.417 | 0.605 | 0.998 | 0.467 | 0.095 | 99.9  | 1     | 0.465 | 0.167 | 28.3 | 1/175(97)  | 0/67(37) | 0/16(10) |
| CYP2D6 | 2828C>del     | NA    | NA    | NA    | 0.998 | 0     | 1     | 42.3  | 1     | 0     | 1     | 26.2 | NA         | NA       | 0/16(0)  |
| CYP2D6 | 2615delAAG    | 0.998 | 0.019 | 0.237 | 0.998 | 0.019 | 0.021 | 39.7  | 1     | 0.03  | 1     | 24.1 | 0/175(7)   | 0/66(4)  | 0/16(1)  |
| CYP2D6 | 2587delGACT   | 0.998 | 0     | 1     | 0.998 | 0     | 1     | 40.1  | 1     | 0     | 1     | 27.7 | 0/176(0)   | 0/68(0)  | 0/16(0)  |
| CYP2D6 | 2573_2574insC | NA    | NA    | NA    | 0.998 | 0     | 1     | 40.5  | 1     | 0     | 1     | 25.4 | NA         | NA       | 0/16(0)  |

|        |              |       |       |       |       |       |       |       |       |       |       |      |           |          |         |
|--------|--------------|-------|-------|-------|-------|-------|-------|-------|-------|-------|-------|------|-----------|----------|---------|
| CYP2D6 | T261I        | NA    | NA    | NA    | 0.998 | 0     | 1     | 40.7  | 1     | 0     | 1     | 27.9 | NA        | NA       | 0/16(0) |
| CYP2D6 | R259X        | 1     | 0.011 | 1     | 0.998 | 0.008 | 1     | 41.4  | 1     | 0.023 | 1     | 28.3 | 0/176(4)  | 0/67(3)  | 0/16(0) |
| CYP2D6 | 2539delAACT  | 0.999 | 0     | 1     | 0.998 | 0     | 1     | 40.7  | 1     | 0     | 1     | 27   | 0/176(0)  | 0/68(0)  | 0/16(0) |
| CYP2D6 | 2291G>A      | NA    | 1     | 0     | 1     | 25.2 | NA        | NA       | NA      |
| CYP2D6 | L213P        | NA    | NA    | NA    | 1     | 0.003 | 1     | 158.8 | 1     | 0.008 | 1     | 28.4 | NA        | NA       | 0/16(0) |
| CYP2D6 | 1973insG     | 1     | 0     | 1     | 1     | 0.003 | 1     | 158.3 | 1     | 0.008 | 1     | 28.1 | 2/174(0)  | 1/66(0)  | 0/16(0) |
| CYP2D6 | 1863_1864ins | 0.999 | 0.004 | 1     | 1     | 0.003 | 1     | 163.7 | 1     | 0     | 1     | 27.7 | 2/174(1)  | 2/68(0)  | 0/16(0) |
| CYP2D6 | 1846G>A      | 0.999 | 0.142 | 0.017 | 1     | 0.166 | 0.745 | 179.2 | 1     | 0.169 | 1     | 22.1 | 2/174(48) | 0/67(20) | 0/16(4) |
| CYP2D6 | G169RorX     | 0.999 | 0     | 1     | 0.998 | 0     | 1     | 153.9 | 0.845 | 0     | 1     | 19.7 | 0/176(0)  | 0/67(0)  | 0/15(0) |
| CYP2D6 | E156A        | NA    | NA    | NA    | 1     | 0     | 1     | 153.6 | 1     | 0     | 1     | 26.3 | NA        | NA       | 0/16(0) |
| CYP2D6 | W152X        | 0.999 | 0.007 | 0.166 | 1     | 0.011 | 1     | 154.3 | 1     | 0.008 | 1     | 19.4 | 0/176(5)  | 0/67(1)  | 0/16(0) |
| CYP2D6 | V136I        | 0.941 | 0.034 | 0     | 1     | 0.021 | 1     | 69.8  | 1     | 0.023 | 1     | 19.4 | 2/157(7)  | 1/55(0)  | 0/16(1) |
| CYP2D6 | F120I        | NA    | NA    | NA    | 0.998 | 0     | 1     | 63.5  | 1     | 0     | 1     | 27.4 | NA        | NA       | 0/16(0) |
| CYP2D6 | T107I        | 0.994 | 0.083 | 1     | 0.981 | 0.041 | 1     | 26    | 1     | 0.03  | 1     | 13.9 | 0/175(7)  | 0/67(3)  | 0/16(1) |
| CYP2D6 | 883G>C       | 1     | 0     | 1     | 0.799 | 0     | 1     | 18.6  | 0.826 | 0     | 1     | 16.6 | 0/174(0)  | 0/68(0)  | 0/14(0) |
| CYP2D6 | R62W         | NA    | NA    | NA    | 0.821 | 0     | 1     | 18.5  | 1     | 0     | 1     | 27.4 | NA        | NA       | 0/15(0) |
| CYP2D6 | 137insT      | 1     | 0     | 1     | 0.983 | 0     | 1     | 22.8  | 1     | 0     | 1     | 26.5 | 0/176(0)  | 0/68(0)  | 0/16(0) |
| CYP2D6 | G42R         | 1     | 0     | 1     | 0.992 | 0     | 1     | 23.8  | 0.959 | 0     | 1     | 26.3 | 0/176(0)  | 0/68(0)  | 0/16(0) |
| CYP2D6 | P34S         | 0.999 | 0.173 | 0.012 | 0.998 | 0.196 | 0.207 | 33.1  | 1     | 0.217 | 0.409 | 24.4 | 0/176(58) | 0/67(24) | 0/16(5) |
| CYP2D6 | R25W         | NA    | NA    | NA    | 0.998 | 0     | 1     | 27.8  | 1     | 0     | 1     | 24.5 | NA        | NA       | 0/16(0) |
| CYP3A5 | 27131insT    | 1     | 0.046 | 1     | 0.984 | 0.022 | 1     | 13.9  | 1     | 0.008 | 1     | 37.7 | 0/176(5)  | 0/68(1)  | 0/16(0) |
| CYP3A5 | 14690G>A     | 1     | 0.048 | 1     | 1     | 0.02  | 1     | 27.7  | 1     | 0.015 | 1     | 35.7 | 0/176(4)  | 0/68(2)  | 0/16(0) |
| CYP3A5 | 6986A>G      | 0.999 | 0.34  | 0.824 | NA    | NA    | NA    | NA    | 1     | 0.199 | 1     | 35   | NA        | 0/68(19) | NA      |
| DPYD   | V995F        | 1     | 0     | 1     | 1     | 0     | 1     | 33.7  | 1     | 0     | 1     | 34.3 | 0/176(0)  | 0/68(0)  | 0/16(0) |
| DPYD   | rs67376798T  | NA    | NA    | NA    | 1     | 0.004 | 1     | 22.9  | 0.998 | 0.002 | 1     | 36.4 | NA        | NA       | 0/16(0) |
| DPYD   | R886H        | 0.996 | 0.002 | 1     | 1     | 0     | 1     | 22.8  | 1     | 0     | 1     | 40.8 | 0/167(0)  | 0/66(0)  | 0/16(0) |
| DPYD   | c.1905+1G>A  | 1     | 0.002 | 1     | 0.998 | 0.001 | 1     | 17.4  | 1     | 0.001 | 1     | 40.3 | 0/176(0)  | 0/68(0)  | 0/16(0) |
| DPYD   | P633X        | 1     | 0     | 1     | 1     | 0     | 1     | 18.6  | 1     | 0     | 1     | 34.6 | 0/176(0)  | 0/68(0)  | 0/16(0) |
| DPYD   | I560S        | 1     | 0.001 | 1     | 1     | 0     | 1     | 26.2  | 1     | 0     | 1     | 34   | 0/176(0)  | 0/68(0)  | 0/16(0) |
| DPYD   | E386X        | NA    | NA    | NA    | 1     | 0     | 1     | 22.8  | 1     | 0     | 1     | 35.6 | NA        | NA       | 0/16(0) |
| DPYD   | V335L        | 1     | 0     | 1     | 1     | 0     | 1     | 24.1  | 1     | 0     | 1     | 32.1 | 0/176(0)  | 0/68(0)  | 0/16(0) |

|         |               |       |       |       |       |       |       |      |       |       |       |      |           |          |         |
|---------|---------------|-------|-------|-------|-------|-------|-------|------|-------|-------|-------|------|-----------|----------|---------|
| DPYD    | R235W         | 1     | 0     | 1     | 1     | 0.001 | 1     | 22.4 | 1     | 0     | 1     | 36.4 | 0/176(0)  | 0/68(0)  | 0/16(0) |
| DPYD    | c.295delTCAT  | 1     | 0     | 1     | 1     | 0     | 1     | 19.3 | 1     | 0     | 1     | 35.4 | 0/176(0)  | 0/68(0)  | 0/16(0) |
| DPYD    | C29R          | 0.998 | 0.301 | 0.615 | 1     | 0.247 | 0.092 | 40.9 | 1     | 0.242 | 0.323 | 34.6 | 0/175(71) | 0/67(26) | 0/16(6) |
| DPYD    | R21Q          | NA    | NA    | NA    | 1     | 0     | 1     | 25.5 | 1     | 0     | 1     | 36.2 | NA        | NA       | 0/16(0) |
| G6PD    | Canton        | 0.999 | 0     | 1     | 1     | 0     | 1     | 29.7 | 0.758 | 0     | 1     | 14.5 | 0/174(0)  | 0/68(0)  | 0/11(0) |
| G6PD    | Chatham       | 0.999 | 0.001 | 1     | 0.995 | 0     | 1     | 24.7 | 0.822 | 0     | 1     | 17   | 0/176(0)  | 0/68(0)  | 0/15(0) |
| G6PD    | Kalyan        | NA    | NA    | NA    | 1     | 0.001 | 1     | 26.5 | 0.828 | 0     | 1     | 17.5 | NA        | NA       | 0/15(0) |
| G6PD    | Mediterranean | 1     | 0.001 | 1     | 0.998 | 0     | 1     | 22.2 | 0.888 | 0     | 1     | 19.2 | 0/176(0)  | 0/68(0)  | 0/15(0) |
| G6PD    | A-            | 0.989 | 0.13  | 1     | 1     | 0.06  | 0.004 | 28   | 1     | 0.066 | 1     | 18.8 | 0/173(9)  | 0/66(5)  | 0/16(2) |
| G6PD    | Asahi         | NA    | NA    | NA    | 1     | 0.021 | 1     | 39.9 | 1     | 0.03  | 1     | 18.7 | NA        | NA       | 0/16(2) |
| G6PD    | Orissa        | NA    | NA    | NA    | 1     | 0     | 1     | 36.5 | 0.919 | 0     | 1     | 19.4 | NA        | NA       | 0/13(0) |
| IFNL3   | rs12979860    | NA    | NA    | NA    | NA    | NA    | NA    | NA   | 1     | 0.375 | 0.272 | 19.8 | NA        | NA       | NA      |
| IFNL3   | rs8099917     | NA    | NA    | NA    | NA    | NA    | NA    | NA   | 1     | 0.147 | 1     | 41   | NA        | NA       | NA      |
| SLCO1B1 | c.-11187G>A   | 0.999 | 0.036 | 1     | NA    | NA    | NA    | NA   | 1     | 0.052 | 1     | 41.3 | NA        | 0/68(7)  | NA      |
| SLCO1B1 | G71R          | NA    | NA    | NA    | 1     | 0     | 1     | 23.2 | 1     | 0     | 1     | 40   | NA        | NA       | 0/16(0) |
| SLCO1B1 | F73L          | 1     | 0     | 1     | 1     | 0     | 1     | 23   | 1     | 0     | 1     | 39.2 | 0/176(0)  | 0/68(0)  | 0/16(0) |
| SLCO1B1 | V82A          | 1     | 0     | 1     | 0.995 | 0     | 1     | 18.2 | 1     | 0     | 1     | 36   | 0/176(0)  | 0/68(0)  | 0/16(0) |
| SLCO1B1 | N130D         | 1     | 0.436 | 0.377 | 1     | 0.463 | 0.747 | 34.8 | 1     | 0.5   | 0.021 | 39.6 | 0/176(89) | 0/68(30) | 0/16(5) |
| SLCO1B1 | P155T         | 0.997 | 0.112 | 0.915 | 1     | 0.121 | 1     | 26.8 | 1     | 0.125 | 1     | 40.7 | 0/174(38) | 0/68(15) | 0/16(2) |
| SLCO1B1 | E156G         | 0.997 | 0     | 1     | 1     | 0     | 1     | 23.6 | 1     | 0     | 1     | 39.4 | 0/171(0)  | 0/68(0)  | 0/16(0) |
| SLCO1B1 | V174A         | 1     | 0.099 | 0.183 | 1     | 0.127 | 1     | 48.5 | 1     | 0.184 | 1     | 38.3 | 0/176(39) | 0/68(23) | 0/16(5) |
| SLCO1B1 | I353T         | 1     | 0     | 1     | 1     | 0     | 1     | 22.4 | 1     | 0     | 1     | 39   | 0/176(0)  | 0/68(0)  | 0/16(0) |
| SLCO1B1 | G488A         | 0.998 | 0.017 | 1     | 0.998 | 0.007 | 1     | 21.6 | 1     | 0.008 | 1     | 39.2 | 0/174(3)  | 0/68(1)  | 0/16(1) |
| SLCO1B1 | L643F         | NA    | NA    | NA    | 1     | 0.047 | 0.565 | 24.5 | 1     | 0.052 | 1     | 40.9 | NA        | NA       | 0/16(3) |
| SLCO1B1 | D655G         | 1     | 0     | 1     | 1     | 0     | 1     | 24   | 1     | 0     | 1     | 39.2 | 0/176(0)  | 0/68(0)  | 0/16(0) |
| TPMT    | Y240C         | 0.999 | 0.045 | 1     | 1     | 0.047 | 1     | 27.4 | 1     | 0.052 | 1     | 41.2 | 0/176(20) | 0/67(7)  | 0/16(0) |
| TPMT    | R215H         | 1     | 0.012 | 1     | 1     | 0.005 | 1     | 23.4 | 1     | 0.008 | 1     | 45   | 0/176(4)  | 0/68(1)  | 0/16(0) |
| TPMT    | c.626-1G>A    | 1     | 0     | 1     | 1     | 0     | 1     | 22.8 | 1     | 0.001 | 1     | 42.9 | 0/176(0)  | 0/68(0)  | 0/16(0) |
| TPMT    | Y180F         | NA    | NA    | NA    | 1     | 0     | 1     | 28.6 | 1     | 0     | 1     | 40.9 | NA        | NA       | 0/16(0) |
| TPMT    | R163H         | NA    | NA    | NA    | 1     | 0     | 1     | 22.6 | 1     | 0     | 1     | 39.7 | NA        | NA       | 0/16(0) |
| TPMT    | A154T         | 0.999 | 0.024 | 0.646 | 1     | 0.038 | 1     | 29.1 | 1     | 0.052 | 1     | 44.2 | 0/175(16) | 1/67(6)  | 0/16(0) |

|        |          |       |       |       |       |       |       |      |   |       |   |      |            |          |         |
|--------|----------|-------|-------|-------|-------|-------|-------|------|---|-------|---|------|------------|----------|---------|
| TPMT   | G144R    | NA    | NA    | NA    | 1     | 0     | 1     | 27.4 | 1 | 0     | 1 | 41   | NA         | NA       | 0/16(0) |
| TPMT   | C132Y    | NA    | NA    | NA    | 1     | 0     | 1     | 37.6 | 1 | 0     | 1 | 40.4 | NA         | NA       | 0/16(0) |
| TPMT   | S125L    | NA    | NA    | NA    | 1     | 0     | 1     | 37.6 | 1 | 0     | 1 | 41.4 | NA         | NA       | 0/16(0) |
| TPMT   | K119T    | NA    | NA    | NA    | 1     | 0.001 | 1     | 20.5 | 1 | 0     | 1 | 35.8 | NA         | NA       | 0/16(0) |
| TPMT   | A80P     | 1     | 0.002 | 1     | 1     | 0.003 | 1     | 23.2 | 1 | 0.001 | 1 | 40.8 | 0/176(2)   | 0/68(0)  | 0/16(0) |
| TPMT   | G71R     | NA    | NA    | NA    | 1     | 0     | 1     | 26.9 | 1 | 0     | 1 | 42   | NA         | NA       | 0/16(0) |
| TPMT   | L49S     | NA    | NA    | NA    | 1     | 0     | 1     | 27   | 1 | 0     | 1 | 40.2 | NA         | NA       | 0/16(0) |
| TPMT   | Q42E     | NA    | NA    | NA    | 1     | 0     | 1     | 22.8 | 1 | 0     | 1 | 43.7 | NA         | NA       | 0/16(0) |
| TPMT   | E28V     | NA    | NA    | NA    | 1     | 0     | 1     | 22.8 | 1 | 0     | 1 | 40   | NA         | NA       | 0/16(0) |
| UGT1A1 | *28      | 0.903 | 0.348 | 0.003 | 0.994 | 0.328 | 0.813 | 35.4 | 1 | 0.294 | 1 | 26.3 | 12/136(57) | 59/3(2)  | 0/16(8) |
| VKORC1 | -1639G>A | 0.997 | 0.277 | 0.017 | NA    | NA    | NA    | NA   | 1 | 0.353 | 1 | 34.6 | NA         | 0/66(36) | NA      |

Supplemental Table 3. Inferred haplotype composition in patients with *CYP2D6* duplication

Shown are log<sub>2</sub>-transformed read depth ratios in patients with heterozygous genotypes and with polyploid *CYP2D6* copy number as determined by either WES or qPCR. The read depth ratios are defined as the ratio of number of reads with alternative allele over number of reads with reference allele. Among patients with diploid *CYP2D6* copy numbers, the log transformed read depth ratios are within -0.6 to 0.6 except for chr22:42526694 (P34S) (Supplemental Figure 5). In all five patients with consistent *CYP2D6* duplication by both WES and CNV (patient #1-#5), we can definitively infer their haplotype compositions. In two patients with conflicting WES and qPCR CNVs (#6 and 7), the WES read depth ratios do not support duplication as inferred byXHMM. In the other three patients (#8-10), the WES read ratios also yield ambiguity, which suggests the possible presence of a *CYP2D6/CYP2D7* hybrid. Hom\_Ref and Hom\_Alt indicate that the patient's DNA was homozygous for the reference or alternative allele, respectively at that variant. WES and qPCR CNV indicate the number of copies of *CYP2D6* estimated using WES vs using qPCR methods, respectively.

| patient | chr22:42526694<br>(P34S, *4) | chr22:42524947<br>(1846G>A, *4) | chr22:42522613<br>(S486T, *2, *4) | chr22:42523943<br>(R296C, *2) | chr22:42524178<br>(2615delAAG, *9) | WES CNV | qPCR CNV | Haplotype<br>composition | Comment                                 |
|---------|------------------------------|---------------------------------|-----------------------------------|-------------------------------|------------------------------------|---------|----------|--------------------------|-----------------------------------------|
| 1       | Hom_Ref                      | Hom_Ref                         | 1.093                             | 0.813                         | Hom_Ref                            | 3N      | 3N       | *1/*2/*2                 |                                         |
| 2       | Hom_Ref                      | Hom_Ref                         | 1.052                             | 1.222                         | Hom_Ref                            | 3N      | 3N       | *1/*2/*2                 |                                         |
| 3       | Hom_Ref                      | Hom_Ref                         | -1.141                            | -0.955                        | Hom_Ref                            | 3N      | 3N       | *1/*1/*2                 |                                         |
| 4       | -0.781                       | -1.188                          | Hom_Alt                           | 0.595                         | Hom_Ref                            | 3N      | 3N       | *2/*2/*4                 |                                         |
| 5       | -0.933                       | -1.322                          | -1.000                            | Ref                           | Hom_Ref                            | 3N      | 3N       | *1/*1/*4                 |                                         |
| 6       | -1.585                       | 0.084                           | 0.119                             | Hom_Ref                       | 0.237                              | 3N      | 2N       | *4/*9 (2N)               | WES read depth ratios do not support 3N |
| 7       | 0.152                        | 0.096                           | Hom_Alt                           | -0.215                        | Hom_Ref                            | 3N      | 2N       | *2/*4 (2N)               | WES read depth ratios do not support 3N |
| 8       | 1.424                        | 0.678                           | -0.556                            | Hom_Ref                       | Hom_Ref                            | 3N      | 2/3/3N   | *1/*4/*4(?N)             | WES read depth ratios yield ambiguity   |
| 9       | 0.663                        | 0.898                           | 0.239                             | Hom_Ref                       | Hom_Ref                            | 2N      | 2/3/2N   | *1/*4/*4(?N)             | WES read depth ratios yield ambiguity   |
| 10      | 0.382                        | 0.765                           | -0.243                            | Hom_Ref                       | Hom_Ref                            | 3N      | 2/3/3N   | *1/*4(?N)                | WES read depth ratios yield ambiguity   |



Supplemental Table 4. Coverage of coding regions of CPIC important genes by WES

\* WES or WGS coverage of exonic region is calculated as % of exonic nucleotides that were interrogated at  $\geq 10X$  in 95% of patients. *UGT1A1* data is based on the first exon that is unique to *UGT1A1*.

| Gene           | WES Average Read Depth (n=636) | WES Coverage of Exonic region * | WGS Average Read Depth (n=68) | WGS Coverage of Exonic region* |
|----------------|--------------------------------|---------------------------------|-------------------------------|--------------------------------|
| <i>CFTR</i>    | 54                             | 96.7%                           | 37.4                          | 100%                           |
| <i>CYP2C19</i> | 56                             | 99.0%                           | 36.2                          | 100%                           |
| <i>CYP2C9</i>  | 57                             | 98.7%                           | 36.6                          | 100%                           |
| <i>CYP2D6</i>  | 123.5                          | 98.3%                           | 24.9                          | 75.2%                          |
| <i>CYP3A5</i>  | 55                             | 98.0%                           | 37.0                          | 100%                           |
| <i>DPYD</i>    | 59                             | 99.3%                           | 35.4                          | 98.7%                          |
| <i>G6PD</i>    | 56                             | 90.3%                           | 15.7                          | 41.5%                          |
| <i>HLA-B</i>   | 78                             | 92.0%                           | 19.7                          | 44.5%                          |
| <i>IFNL3</i>   | 136                            | 100%                            | 25.5                          | 84.4%                          |
| <i>SLCO1B1</i> | 42                             | 93.1%                           | 37.5                          | 98.2%                          |
| <i>TPMT</i>    | 60                             | 100%                            | 40.2                          | 100%                           |
| <i>UGT1A1</i>  | 67                             | 86.0%                           | 33.9                          | 99.4%                          |
| <i>VKORC1</i>  | 61                             | 77.6%                           | 23.2                          | 64.8%                          |

Supplemental Table 5. Coverage of exonic regions of CPIC important genes by WES or WGS by exon

| gene    | refseq    | Exon | chr | fstart    | fend      | WES              |                                | WGS              |                                |
|---------|-----------|------|-----|-----------|-----------|------------------|--------------------------------|------------------|--------------------------------|
|         |           |      |     |           |           | Average Coverage | % samples with coverage >= 10X | Average Coverage | % samples with coverage >= 10X |
| CFTR    | NM_000492 | 1    | 7   | 117120148 | 117120201 | 36.7             | 100%                           | 24.1             | 100%                           |
| CFTR    | NM_000492 | 2    | 7   | 117144306 | 117144417 | 48.3             | 100%                           | 37.8             | 100%                           |
| CFTR    | NM_000492 | 3    | 7   | 117149087 | 117149196 | 63.7             | 100%                           | 38.8             | 100%                           |
| CFTR    | NM_000492 | 4    | 7   | 117170952 | 117171168 | 88.5             | 100%                           | 37.5             | 100%                           |
| CFTR    | NM_000492 | 5    | 7   | 117174329 | 117174419 | 50.7             | 100%                           | 42.3             | 100%                           |
| CFTR    | NM_000492 | 6    | 7   | 117175301 | 117175465 | 70.6             | 100%                           | 34.2             | 100%                           |
| CFTR    | NM_000492 | 7    | 7   | 117176601 | 117176727 | 47.6             | 100%                           | 40.6             | 100%                           |
| CFTR    | NM_000492 | 8    | 7   | 117180153 | 117180400 | 33.8             | 99%                            | 35.3             | 100%                           |
| CFTR    | NM_000492 | 9    | 7   | 117182069 | 117182162 | 63.3             | 100%                           | 40.2             | 100%                           |
| CFTR    | NM_000492 | 10   | 7   | 117188694 | 117188877 | 97.0             | 100%                           | 53.7             | 100%                           |
| CFTR    | NM_000492 | 11   | 7   | 117199517 | 117199709 | 34.9             | 100%                           | 38.8             | 100%                           |
| CFTR    | NM_000492 | 12   | 7   | 117227792 | 117227887 | 68.6             | 100%                           | 36.5             | 100%                           |
| CFTR    | NM_000492 | 13   | 7   | 117230406 | 117230493 | 69.8             | 100%                           | 41.4             | 100%                           |
| CFTR    | NM_000492 | 14   | 7   | 117231987 | 117232711 | 58.0             | 100%                           | 37.2             | 100%                           |
| CFTR    | NM_000492 | 15   | 7   | 117234983 | 117235112 | 28.9             | 99%                            | 38.0             | 100%                           |
| CFTR    | NM_000492 | 16   | 7   | 117242879 | 117242917 | 43.8             | 100%                           | 35.7             | 100%                           |
| CFTR    | NM_000492 | 17   | 7   | 117243585 | 117243836 | 72.7             | 100%                           | 36.2             | 100%                           |
| CFTR    | NM_000492 | 18   | 7   | 117246727 | 117246807 | 96.3             | 100%                           | 40.9             | 100%                           |
| CFTR    | NM_000492 | 19   | 7   | 117250572 | 117250723 | 71.7             | 100%                           | 35.5             | 100%                           |
| CFTR    | NM_000492 | 20   | 7   | 117251634 | 117251862 | 54.5             | 100%                           | 34.3             | 100%                           |
| CFTR    | NM_000492 | 21   | 7   | 117254666 | 117254767 | 62.2             | 100%                           | 37.1             | 100%                           |
| CFTR    | NM_000492 | 22   | 7   | 117267575 | 117267824 | 59.9             | 100%                           | 37.7             | 100%                           |
| CFTR    | NM_000492 | 23   | 7   | 117282491 | 117282647 | 37.7             | 100%                           | 35.1             | 100%                           |
| CFTR    | NM_000492 | 24   | 7   | 117292895 | 117292985 | 53.6             | 100%                           | 36.8             | 100%                           |
| CFTR    | NM_000492 | 25   | 7   | 117304741 | 117304914 | 62.7             | 100%                           | 33.4             | 100%                           |
| CFTR    | NM_000492 | 26   | 7   | 117305512 | 117305618 | 59.4             | 100%                           | 39.5             | 100%                           |
| CFTR    | NM_000492 | 27   | 7   | 117306961 | 117307162 | 54.2             | 100%                           | 31.7             | 100%                           |
| CYP2C19 | NM_000769 | 1    | 10  | 96522462  | 96522630  | 76.7             | 100%                           | 38.2             | 100%                           |
| CYP2C19 | NM_000769 | 2    | 10  | 96534814  | 96534977  | 77.5             | 100%                           | 33.7             | 100%                           |
| CYP2C19 | NM_000769 | 3    | 10  | 96535146  | 96535296  | 89.0             | 100%                           | 31.7             | 100%                           |
| CYP2C19 | NM_000769 | 4    | 10  | 96540255  | 96540416  | 37.4             | 100%                           | 38.7             | 100%                           |
| CYP2C19 | NM_000769 | 5    | 10  | 96541577  | 96541754  | 41.0             | 100%                           | 40.4             | 100%                           |
| CYP2C19 | NM_000769 | 6    | 10  | 96580252  | 96580394  | 80.4             | 100%                           | 37.3             | 100%                           |
| CYP2C19 | NM_000769 | 7    | 10  | 96602593  | 96602781  | 32.9             | 100%                           | 32.3             | 100%                           |
| CYP2C19 | NM_000769 | 8    | 10  | 96609673  | 96609815  | 41.5             | 100%                           | 37.9             | 100%                           |
| CYP2C19 | NM_000769 | 9    | 10  | 96612489  | 96612671  | 110.1            | 100%                           | 36.0             | 100%                           |
| CYP2C9  | NM_000771 | 1    | 10  | 96698439  | 96698607  | 107.4            | 100%                           | 36.3             | 100%                           |
| CYP2C9  | NM_000771 | 2    | 10  | 96701614  | 96701777  | 92.3             | 100%                           | 38.4             | 100%                           |
| CYP2C9  | NM_000771 | 3    | 10  | 96701948  | 96702098  | 83.5             | 100%                           | 32.1             | 100%                           |
| CYP2C9  | NM_000771 | 4    | 10  | 96707535  | 96707696  | 34.8             | 100%                           | 38.8             | 100%                           |
| CYP2C9  | NM_000771 | 5    | 10  | 96708864  | 96709041  | 44.8             | 100%                           | 41.9             | 100%                           |
| CYP2C9  | NM_000771 | 6    | 10  | 96731860  | 96732002  | 64.9             | 100%                           | 37.4             | 100%                           |
| CYP2C9  | NM_000771 | 7    | 10  | 96740939  | 96741127  | 32.0             | 100%                           | 31.6             | 100%                           |
| CYP2C9  | NM_000771 | 8    | 10  | 96745789  | 96745931  | 42.8             | 100%                           | 38.6             | 100%                           |
| CYP2C9  | NM_000771 | 9    | 10  | 96748603  | 96748785  | 121.3            | 100%                           | 34.1             | 100%                           |
| CYP2D6  | NM_000106 | 1    | 22  | 42526613  | 42526793  | 69.3             | 95.9%                          | 24.7             | 97%                            |
| CYP2D6  | NM_000106 | 2    | 22  | 42525739  | 42525911  | 53.8             | 62.9%                          | 12.3             | 48%                            |
| CYP2D6  | NM_000106 | 3    | 22  | 42525034  | 42525187  | 271.3            | 84.1%                          | 18.8             | 78%                            |
| CYP2D6  | NM_000106 | 4    | 22  | 42524785  | 42524946  | 247.4            | 98.2%                          | 27.0             | 98%                            |

|        |           |    |    |           |           |       |       |      |      |
|--------|-----------|----|----|-----------|-----------|-------|-------|------|------|
| CYP2D6 | NM_000106 | 5  | 22 | 42524175  | 42524352  | 93.8  | 96.7% | 27.9 | 95%  |
| CYP2D6 | NM_000106 | 6  | 22 | 42523843  | 42523985  | 92.1  | 97.0% | 27.0 | 97%  |
| CYP2D6 | NM_000106 | 7  | 22 | 42523448  | 42523636  | 163.8 | 98.0% | 34.1 | 97%  |
| CYP2D6 | NM_000106 | 8  | 22 | 42522852  | 42522994  | 203.2 | 96.0% | 25.6 | 97%  |
| CYP2D6 | NM_000106 | 9  | 22 | 42522575  | 42522754  | 194.9 | 97.5% | 26.4 | 98%  |
| CYP3A5 | NM_000777 | 1  | 7  | 99277448  | 99277519  | 47.0  | 100%  | 31.5 | 100% |
| CYP3A5 | NM_000777 | 2  | 7  | 99273737  | 99273831  | 75.7  | 100%  | 36.7 | 100% |
| CYP3A5 | NM_000777 | 3  | 7  | 99272155  | 99272208  | 41.5  | 100%  | 41.0 | 100% |
| CYP3A5 | NM_000777 | 4  | 7  | 99270202  | 99270302  | 43.7  | 100%  | 34.9 | 100% |
| CYP3A5 | NM_000777 | 5  | 7  | 99264574  | 99264688  | 56.1  | 100%  | 37.6 | 100% |
| CYP3A5 | NM_000777 | 6  | 7  | 99264223  | 99264312  | 52.6  | 100%  | 33.7 | 100% |
| CYP3A5 | NM_000777 | 7  | 7  | 99262788  | 99262937  | 106.1 | 100%  | 35.7 | 100% |
| CYP3A5 | NM_000777 | 8  | 7  | 99261590  | 99261718  | 62.2  | 100%  | 42.4 | 100% |
| CYP3A5 | NM_000777 | 9  | 7  | 99260438  | 99260505  | 61.9  | 100%  | 36.0 | 100% |
| CYP3A5 | NM_000777 | 10 | 7  | 99258121  | 99258282  | 74.3  | 100%  | 34.9 | 100% |
| CYP3A5 | NM_000777 | 11 | 7  | 99250175  | 99250402  | 29.5  | 100%  | 36.4 | 100% |
| CYP3A5 | NM_000777 | 12 | 7  | 99247695  | 99247855  | 59.0  | 100%  | 40.4 | 100% |
| CYP3A5 | NM_000777 | 13 | 7  | 99245927  | 99246023  | 57.7  | 100%  | 40.1 | 100% |
| DPYD   | NM_000110 | 1  | 1  | 98386439  | 98386478  | 81.3  | 71%   | 13.7 | 59%  |
| DPYD   | NM_000110 | 2  | 1  | 98348819  | 98348930  | 40.4  | 100%  | 35.8 | 100% |
| DPYD   | NM_000110 | 3  | 1  | 98293669  | 98293752  | 112.8 | 100%  | 37.3 | 100% |
| DPYD   | NM_000110 | 4  | 1  | 98205947  | 98206035  | 31.7  | 100%  | 38.8 | 100% |
| DPYD   | NM_000110 | 5  | 1  | 98187065  | 98187227  | 84.8  | 100%  | 34.5 | 100% |
| DPYD   | NM_000110 | 6  | 1  | 98164906  | 98165103  | 75.2  | 100%  | 35.4 | 100% |
| DPYD   | NM_000110 | 7  | 1  | 98157272  | 98157354  | 43.9  | 100%  | 37.6 | 100% |
| DPYD   | NM_000110 | 8  | 1  | 98144650  | 98144738  | 56.8  | 100%  | 41.1 | 100% |
| DPYD   | NM_000110 | 9  | 1  | 98060614  | 98060722  | 36.6  | 100%  | 38.3 | 100% |
| DPYD   | NM_000110 | 10 | 1  | 98058773  | 98058943  | 69.8  | 100%  | 33.8 | 100% |
| DPYD   | NM_000110 | 11 | 1  | 98039315  | 98039526  | 39.4  | 100%  | 37.5 | 100% |
| DPYD   | NM_000110 | 12 | 1  | 98015115  | 98015300  | 78.6  | 100%  | 36.6 | 100% |
| DPYD   | NM_000110 | 13 | 1  | 97981281  | 97981497  | 54.3  | 100%  | 35.0 | 100% |
| DPYD   | NM_000110 | 14 | 1  | 97915614  | 97915779  | 38.4  | 100%  | 38.5 | 100% |
| DPYD   | NM_000110 | 15 | 1  | 97847948  | 97848017  | 52.7  | 100%  | 39.0 | 100% |
| DPYD   | NM_000110 | 16 | 1  | 97839116  | 97839200  | 87.4  | 100%  | 34.7 | 100% |
| DPYD   | NM_000110 | 17 | 1  | 97771732  | 97771853  | 71.8  | 100%  | 32.7 | 100% |
| DPYD   | NM_000110 | 18 | 1  | 97770814  | 97770934  | 53.1  | 100%  | 32.1 | 100% |
| DPYD   | NM_000110 | 19 | 1  | 97700407  | 97700550  | 56.4  | 100%  | 33.0 | 100% |
| DPYD   | NM_000110 | 20 | 1  | 97658624  | 97658804  | 74.5  | 100%  | 35.9 | 100% |
| DPYD   | NM_000110 | 21 | 1  | 97564044  | 97564188  | 66.1  | 100%  | 40.6 | 100% |
| DPYD   | NM_000110 | 22 | 1  | 97547885  | 97548026  | 53.9  | 100%  | 39.8 | 100% |
| DPYD   | NM_000110 | 23 | 1  | 97544531  | 97544702  | 136.8 | 100%  | 33.3 | 100% |
| G6PD   | NM_000402 | 1  | X  | 153775003 | 153775085 | 6.7   | 11.9% | 3.1  | 5%   |
| G6PD   | NM_000402 | 2  | X  | 153774250 | 153774378 | 54.2  | 93.5% | 20.4 | 89%  |
| G6PD   | NM_000402 | 3  | X  | 153764355 | 153764393 | 154.3 | 87.3% | 18.5 | 81%  |
| G6PD   | NM_000402 | 4  | X  | 153764151 | 153764260 | 156.8 | 85.9% | 17.8 | 83%  |
| G6PD   | NM_000402 | 5  | X  | 153763382 | 153763600 | 61.9  | 86.9% | 18.0 | 84%  |
| G6PD   | NM_000402 | 6  | X  | 153762552 | 153762711 | 54.7  | 86.6% | 18.3 | 79%  |
| G6PD   | NM_000402 | 7  | X  | 153762249 | 153762375 | 35.5  | 92.4% | 21.0 | 87%  |
| G6PD   | NM_000402 | 8  | X  | 153761790 | 153761884 | 60.8  | 88.2% | 18.5 | 84%  |
| G6PD   | NM_000402 | 9  | X  | 153761156 | 153761343 | 55.7  | 86.4% | 17.5 | 79%  |
| G6PD   | NM_000402 | 10 | X  | 153760781 | 153761017 | 102.7 | 82.2% | 16.4 | 75%  |
| G6PD   | NM_000402 | 11 | X  | 153760600 | 153760677 | 152.0 | 78.5% | 15.2 | 67%  |
| G6PD   | NM_000402 | 12 | X  | 153760402 | 153760495 | 102.2 | 61.4% | 12.1 | 56%  |
| G6PD   | NM_000402 | 13 | X  | 153760214 | 153760305 | 37.9  | 31.9% | 7.7  | 27%  |
| HLA-B  | NM_005514 | 1  | 6  | 31324862  | 31324935  | 131.9 | 65.5% | 12.5 | 56%  |
| HLA-B  | NM_005514 | 2  | 6  | 31324464  | 31324734  | 86.5  | 60.1% | 11.2 | 51%  |
| HLA-B  | NM_005514 | 3  | 6  | 31323943  | 31324219  | 46.8  | 65.3% | 12.0 | 56%  |

|         |           |    |    |           |           |       |       |      |      |
|---------|-----------|----|----|-----------|-----------|-------|-------|------|------|
| HLA-B   | NM_005514 | 4  | 6  | 31323093  | 31323369  | 112.8 | 100%  | 31.7 | 100% |
| HLA-B   | NM_005514 | 5  | 6  | 31322883  | 31323000  | 72.9  | 100%  | 30.1 | 100% |
| HLA-B   | NM_005514 | 6  | 6  | 31322409  | 31322442  | 87.9  | 100%  | 25.3 | 100% |
| HLA-B   | NM_005514 | 7  | 6  | 31322259  | 31322303  | 53.3  | 89.3% | 15.4 | 83%  |
| IFNL3   | NM_172139 | 1  | 19 | 39735427  | 39735607  | 373.2 | 99.4% | 28.6 | 98%  |
| IFNL3   | NM_172139 | 2  | 19 | 39735056  | 39735134  | 142.3 | 98.5% | 23.7 | 100% |
| IFNL3   | NM_172139 | 3  | 19 | 39734647  | 39734797  | 135.4 | 97.0% | 24.0 | 95%  |
| IFNL3   | NM_172139 | 4  | 19 | 39734463  | 39734547  | 161.4 | 90.5% | 23.3 | 87%  |
| IFNL3   | NM_172139 | 5  | 19 | 39734271  | 39734370  | 133.7 | 100%  | 27.7 | 100% |
| SLCO1B1 | NM_006446 | 1  | 12 | 21294508  | 21294592  | 42.0  | 100%  | 40.4 | 100% |
| SLCO1B1 | NM_006446 | 2  | 12 | 21325583  | 21325725  | 58.5  | 100%  | 39.7 | 100% |
| SLCO1B1 | NM_006446 | 3  | 12 | 21327510  | 21327643  | 35.8  | 100%  | 35.1 | 100% |
| SLCO1B1 | NM_006446 | 4  | 12 | 21329709  | 21329831  | 43.6  | 100%  | 40.4 | 100% |
| SLCO1B1 | NM_006446 | 5  | 12 | 21331509  | 21331656  | 90.5  | 100%  | 38.5 | 100% |
| SLCO1B1 | NM_006446 | 6  | 12 | 21331855  | 21331954  | 78.1  | 100%  | 38.6 | 100% |
| SLCO1B1 | NM_006446 | 7  | 12 | 21349879  | 21350122  | 21.5  | 95.9% | 39.2 | 100% |
| SLCO1B1 | NM_006446 | 8  | 12 | 21353441  | 21353606  | 48.5  | 100%  | 41.3 | 100% |
| SLCO1B1 | NM_006446 | 9  | 12 | 21355424  | 21355620  | 37.8  | 100%  | 39.0 | 100% |
| SLCO1B1 | NM_006446 | 10 | 12 | 21358801  | 21358967  | 40.5  | 100%  | 39.3 | 100% |
| SLCO1B1 | NM_006446 | 11 | 12 | 21370052  | 21370237  | 36.1  | 100%  | 40.2 | 100% |
| SLCO1B1 | NM_006446 | 12 | 12 | 21375233  | 21375298  | 28.7  | 91.7% | 15.9 | 92%  |
| SLCO1B1 | NM_006446 | 13 | 12 | 21377655  | 21377773  | 63.3  | 100%  | 36.6 | 100% |
| SLCO1B1 | NM_006446 | 14 | 12 | 21391912  | 21392123  | 63.6  | 100%  | 40.5 | 100% |
| TPMT    | NM_000367 | 1  | 6  | 18149218  | 18149358  | 78.3  | 100%  | 37.0 | 100% |
| TPMT    | NM_000367 | 2  | 6  | 18148053  | 18148146  | 54.8  | 100%  | 41.3 | 100% |
| TPMT    | NM_000367 | 3  | 6  | 18143826  | 18143959  | 50.3  | 100%  | 36.9 | 100% |
| TPMT    | NM_000367 | 4  | 6  | 18139895  | 18139948  | 70.6  | 100%  | 38.1 | 100% |
| TPMT    | NM_000367 | 5  | 6  | 18139193  | 18139268  | 51.5  | 100%  | 43.1 | 100% |
| TPMT    | NM_000367 | 6  | 6  | 18134034  | 18134120  | 67.2  | 100%  | 41.3 | 100% |
| TPMT    | NM_000367 | 7  | 6  | 18132363  | 18132408  | 50.9  | 100%  | 41.4 | 100% |
| TPMT    | NM_000367 | 8  | 6  | 18130898  | 18131011  | 82.2  | 100%  | 42.3 | 100% |
| UGT1A1  | NM_000463 | 1  | 2  | 234668933 | 234669797 | 67.0  | 100%  | 32.2 | 100% |
| VKORC1  | NM_024006 | 1  | 16 | 31105877  | 31106050  | 60.6  | 80.1% | 17.1 | 76%  |
| VKORC1  | NM_024006 | 2  | 16 | 31104632  | 31104742  | 15.5  | 96.8% | 21.0 | 98%  |
| VKORC1  | NM_024006 | 3  | 16 | 31102454  | 31102663  | 119.3 | 100%  | 31.3 | 100% |

Supplemental Table 6. Coding variants discovered by WES or WGS that were not included among CPIC important variants

6A. Coding variants discovered by WES that were not included among CPIC important variants.

ExonicFunc.refGene and AA.Change (amino acid substitution) are based on annotation from Refseq release 69 (genome assembly GRCh37/hg19) ; snp138 provides the rs ID number for each variant based on build 138 of dbSNP; ExAC.maf is the minor allele frequency among all samples (multiple races) based on <http://exac.broadinstitute.org/> (version 0.3); CADD Score is the estimated Combined Annotation Dependent Depletion score based on <http://cadd.gs.washington.edu/> (v1.3), higher CADD score indicate possible damaging variants.

| Gene refGene | chr.pos        | Ref | Alt | ExonicFunc.refGene   | AA.Change | snp138      | ExAC.maf  | CADD Score |
|--------------|----------------|-----|-----|----------------------|-----------|-------------|-----------|------------|
| CFTR         | chr7:117149143 | C   | T   | nonsynonymous SNV    | p.R74W    | rs115545701 | 0.001723  | 19.66      |
| CFTR         | chr7:117149147 | G   | A   | nonsynonymous SNV    | p.R75Q    | rs1800076   | 0.01536   | 34         |
| CFTR         | chr7:117149189 | A   | G   | nonsynonymous SNV    | p.Y89C    |             | 8.26E-06  | 19.35      |
| CFTR         | chr7:117171029 | G   | A   | nonsynonymous SNV    | p.R117H   | rs78655421  | 0.001537  | 22.4       |
| CFTR         | chr7:117171097 | C   | T   | nonsynonymous SNV    | p.P140S   | rs145900055 | 6.68E-05  | 29.4       |
| CFTR         | chr7:117171122 | T   | C   | nonsynonymous SNV    | p.I148T   | rs35516286  | 0.001871  | 25         |
| CFTR         | chr7:117174330 | A   | G   | nonsynonymous SNV    | p.T164A   | rs200885306 | 2.65E-05  | 10.84      |
| CFTR         | chr7:117174349 | G   | A   | nonsynonymous SNV    | p.R170H   | rs1800079   | 0.000481  | 23.7       |
| CFTR         | chr7:117174411 | T   | G   | nonsynonymous SNV    | p.F191V   | rs141482808 | 8.46E-06  | 23.5       |
| CFTR         | chr7:117176664 | T   | C   | nonsynonymous SNV    | p.I269T   | rs201016820 | 8.87E-05  | 22.6       |
| CFTR         | chr7:117176711 | A   | T   | nonsynonymous SNV    | p.I285F   | rs151073129 | 0.0004093 | 23.2       |
| CFTR         | chr7:117180173 | C   | T   | nonsynonymous SNV    | p.R297W   |             | 8.41E-05  | 20.5       |
| CFTR         | chr7:117180324 | G   | C   | nonsynonymous SNV    | p.R347P   | rs77932196  | 8.24E-06  | 27.3       |
| CFTR         | chr7:117180338 | C   | T   | nonsynonymous SNV    | p.R352W   | rs193922497 | 0.0004698 | 20.9       |
| CFTR         | chr7:117199533 | G   | A   | nonsynonymous SNV    | p.V470M   | rs213950    | 0.4829    | 2.095      |
| CFTR         | chr7:117199562 | G   | C   | nonsynonymous SNV    | p.E479D   |             | 2.47E-05  | 14.17      |
| CFTR         | chr7:117199648 | T   | G   | nonsynonymous SNV    | p.F508C   | rs74571530  | 0.0009611 | 22.4       |
| CFTR         | chr7:117199663 | A   | G   | nonsynonymous SNV    | p.D513G   |             | NA        | 21.5       |
| CFTR         | chr7:117227832 | G   | T   | stopgain SNV         | p.G542X   | rs113993959 | 0.0002649 | 29.2       |
| CFTR         | chr7:117227874 | A   | G   | nonsynonymous SNV    | p.I556V   | rs75789129  | 0.00291   | 12.91      |
| CFTR         | chr7:117230454 | G   | C   | nonsynonymous SNV    | p.G576A   | rs1800098   | 0.005167  | 15.81      |
| CFTR         | chr7:117232086 | G   | A   | nonsynonymous SNV    | p.G622D   | rs121908759 | 0.0001335 | 26         |
| CFTR         | chr7:117232223 | C   | T   | nonsynonymous SNV    | p.R668C   | rs1800100   | 0.006151  | 16.66      |
| CFTR         | chr7:117232266 | -   | A   | frameshift insertion | p.T682fs  |             | 5.85E-05  | NA         |
| CFTR         | chr7:117232300 | T   | G   | nonsynonymous SNV    | p.F693L   | rs145540754 | 0.0001088 | 8.771      |
| CFTR         | chr7:117232374 | C   | G   | nonsynonymous SNV    | p.P718R   | rs142432539 | 2.49E-05  | 9.041      |
| CFTR         | chr7:117232394 | G   | A   | nonsynonymous SNV    | p.E725K   | rs199791061 | 9.12E-05  | 35         |
| CFTR         | chr7:117232481 | G   | A   | nonsynonymous SNV    | p.V754M   | rs150157202 | 0.001954  | 0.769      |
| CFTR         | chr7:117232642 | A   | G   | nonsynonymous SNV    | p.I807M   | rs1800103   | 0.0007237 | 17.82      |
| CFTR         | chr7:117232671 | G   | T   | nonsynonymous SNV    | p.G817V   | rs148604667 | 8.15E-05  | 0.227      |
| CFTR         | chr7:117234995 | T   | G   | nonsynonymous SNV    | p.F834L   | rs200735475 | 0.0002558 | 8.424      |
| CFTR         | chr7:117243784 | G   | A   | nonsynonymous SNV    | p.M952I   |             | 3.30E-05  | 25.6       |
| CFTR         | chr7:117250575 | G   | C   | nonsynonymous SNV    | p.L997F   | rs1800111   | 0.002104  | 16.06      |
| CFTR         | chr7:117251649 | T   | G   | nonsynonymous SNV    | p.F1052V  |             | 0.0006578 | 25.1       |
| CFTR         | chr7:117251700 | G   | A   | nonsynonymous SNV    | p.G1069R  | rs200321110 | 0.0002335 | 11.74      |
| CFTR         | chr7:117251704 | G   | A   | nonsynonymous SNV    | p.R1070Q  | rs78769542  | 0.0008077 | 34         |
| CFTR         | chr7:117251751 | A   | T   | nonsynonymous SNV    | p.T1086S  | rs373043500 | NA        | 22.4       |
| CFTR         | chr7:117254753 | G   | C   | nonsynonymous SNV    | p.D1152H  |             | 0.0002644 | 22.8       |
| CFTR         | chr7:117267592 | G   | T   | nonsynonymous SNV    | p.R1162L  | rs1800120   | 0.0006808 | 32         |

|         |                |    |    |                      |          |             |           |       |
|---------|----------------|----|----|----------------------|----------|-------------|-----------|-------|
| CFTR    | chr7:117267779 | T  | A  | nonsynonymous SNV    | p.N1224K | rs371475225 | 0.0002154 | 5.556 |
| CFTR    | chr7:117267812 | T  | G  | nonsynonymous SNV    | p.S1235R | rs34911792  | 0.004992  | 12.5  |
| CFTR    | chr7:117282582 | G  | A  | nonsynonymous SNV    | p.D1270N | rs11971167  | 0.001463  | 33    |
| CFTR    | chr7:117305608 | A  | C  | nonsynonymous SNV    | p.Q1411P | rs150177304 | 1.66E-05  | 19.42 |
| CFTR    | chr7:117307052 | G  | A  | nonsynonymous SNV    | p.D1445N | rs148783445 | 0.0004711 | 32    |
| CYP2C19 | chr10:96522517 | A  | C  | nonsynonymous SNV    | p.I19L   | rs17882687  | 0.002127  | 0.012 |
| CYP2C19 | chr10:96522547 | C  | T  | nonsynonymous SNV    | p.L29F   |             | 4.95E-05  | 2.751 |
| CYP2C19 | chr10:96534863 | C  | T  | nonsynonymous SNV    | p.R73C   | rs145328984 | 0.0002553 | 12.9  |
| CYP2C19 | chr10:96534887 | G  | A  | nonsynonymous SNV    | p.E81K   | rs149072229 | 0.0003871 | 6.735 |
| CYP2C19 | chr10:96534922 | G  | C  | nonsynonymous SNV    | p.E92D   | rs17878459  | 0.0236    | 2.054 |
| CYP2C19 | chr10:96535180 | A  | C  | nonsynonymous SNV    | p.E122A  | rs17885179  | 0.0009637 | 17.51 |
| CYP2C19 | chr10:96535246 | G  | A  | nonsynonymous SNV    | p.R144H  | rs17884712  | 0.001079  | 17.88 |
| CYP2C19 | chr10:96540292 | C  | T  | nonsynonymous SNV    | p.A173V  | rs61311738  | 0.005818  | 16.17 |
| CYP2C19 | chr10:96541615 | C  | T  | nonsynonymous SNV    | p.P227L  | rs6413438   | 0.000448  | 17.99 |
| CYP2C19 | chr10:96602623 | G  | A  | nonsynonymous SNV    | p.V331I  | rs3758581   | 0.06242   | 0.001 |
| CYP2C19 | chr10:96609752 | C  | T  | nonsynonymous SNV    | p.R410C  | rs17879685  | 0.001517  | 4.573 |
| CYP2C19 | chr10:96609793 | C  | A  | nonsynonymous SNV    | p.N423K  |             | NA        | 5.789 |
| CYP2C19 | chr10:96612493 | A  | T  | nonsynonymous SNV    | p.K432I  | rs146991374 | 0.000264  | 12.77 |
| CYP2C9  | chr10:96698447 | C  | A  | nonsynonymous SNV    | p.S3Y    |             | 1.65E-05  | 7.786 |
| CYP2C9  | chr10:96701988 | G  | T  | nonsynonymous SNV    | p.R124L  | rs12414460  | 4.95E-05  | 23    |
| CYP2C9  | chr10:96702011 | C  | T  | nonsynonymous SNV    | p.R132W  | rs199523631 | 0.0002804 | 18.39 |
| CYP2C9  | chr10:96707581 | A  | G  | nonsynonymous SNV    | p.N176S  |             | NA        | 19.94 |
| CYP2C9  | chr10:96708974 | A  | G  | nonsynonymous SNV    | p.H251R  | rs2256871   | 0.006715  | 23.9  |
| CYP2C9  | chr10:96741056 | G  | A  | nonsynonymous SNV    | p.D360N  |             | 8.25E-06  | 9.298 |
| CYP2D6  | chr22:42522601 | T  | C  | nonsynonymous SNV    | p.Y490C  | rs199722016 | 0.000394  | 11.92 |
| CYP2D6  | chr22:42522650 | G  | A  | nonsynonymous SNV    | p.R474W  |             | 3.85E-05  | 16.17 |
| CYP2D6  | chr22:42523532 | -  | CA | frameshift insertion | p.Q364fs |             | 0.0001986 | NA    |
| CYP2D6  | chr22:42523568 | G  | C  | nonsynonymous SNV    | p.H352D  |             | NA        | 5.746 |
| CYP2D6  | chr22:42523613 | C  | T  | nonsynonymous SNV    | p.D337N  | rs78209835  | 0.003382  | 13.7  |
| CYP2D6  | chr22:42524219 | G  | T  | nonsynonymous SNV    | p.P267H  | rs148769737 | 0.0002567 | 14.57 |
| CYP2D6  | chr22:42524310 | C  | A  | nonsynonymous SNV    | p.A237S  | rs28371717  | 0.00754   | 11.43 |
| CYP2D6  | chr22:42525077 | C  | T  | nonsynonymous SNV    | p.E155K  | rs28371710  | 0.003873  | 10.34 |
| CYP2D6  | chr22:42525778 | G  | T  | nonsynonymous SNV    | p.P105H  | rs147149624 | 8.90E-06  | 11.57 |
| CYP2D6  | chr22:42525801 | G  | C  | nonsynonymous SNV    | p.D97E   | rs76802407  | 0.0002136 | 14.29 |
| CYP2D6  | chr22:42525862 | G  | -  | frameshift deletion  | p.P77fs  |             | 3.77E-05  | NA    |
| CYP2D6  | chr22:42526664 | C  | T  | nonsynonymous SNV    | p.G44S   | rs146838345 | 9.68E-06  | 21.9  |
| CYP2D6  | chr22:42526712 | G  | A  | nonsynonymous SNV    | p.R28C   | rs138100349 | 0.003579  | 14.77 |
| CYP2D6  | chr22:42526717 | C  | T  | nonsynonymous SNV    | p.R26H   | rs28371696  | 0.003407  | 14.41 |
| CYP2D6  | chr22:42526763 | C  | T  | nonsynonymous SNV    | p.V11M   | rs72552262  | 0.05301   | 3.418 |
| CYP2D6  | chr22:42526775 | C  | T  | nonsynonymous SNV    | p.V7M    | rs72549358  | 0.00328   | 1.817 |
| CYP3A5  | chr7:99245981  | T  | C  | nonsynonymous SNV    | p.K486E  |             | 8.25E-06  | 14.32 |
| CYP3A5  | chr7:99247736  | AC | A  | frameshift deletion  | p.V458fs |             | NA        | NA    |
| CYP3A5  | chr7:99250236  | G  | T  | nonsynonymous SNV    | p.T398N  | rs28365083  | 0.003535  | 5.859 |
| CYP3A5  | chr7:99261610  | C  | T  | nonsynonymous SNV    | p.R260H  | rs376773432 | 6.61E-05  | 11    |
| CYP3A5  | chr7:99270222  | G  | T  | nonsynonymous SNV    | p.S100Y  | rs41279857  | 0.00159   | 13.45 |
| CYP3A5  | chr7:99273810  | -  | C  | frameshift insertion | p.G31fs  | rs200579169 | 0.00747   | NA    |
| CYP3A5  | chr7:99273815  | G  | A  | nonsynonymous SNV    | p.H30Y   | rs28383468  | 0.007471  | 0.239 |
| DPYD    | chr1:97544543  | G  | T  | nonsynonymous SNV    | p.P1023T | rs114096998 | 0.003428  | 13.21 |
| DPYD    | chr1:97544549  | C  | G  | nonsynonymous SNV    | p.V1021L | rs148799944 | 7.42E-05  | 11.25 |
| DPYD    | chr1:97544558  | G  | C  | nonsynonymous SNV    | p.P1018A |             | NA        | 17.5  |
| DPYD    | chr1:97544695  | T  | C  | nonsynonymous SNV    | p.Q972R  | rs145529148 | 0.000239  | 8.974 |
| DPYD    | chr1:97564058  | A  | G  | nonsynonymous SNV    | p.I918T  |             | 1.65E-05  | 9.733 |
| DPYD    | chr1:97700493  | G  | C  | nonsynonymous SNV    | p.P786R  |             | 8.27E-06  | 23.8  |
| DPYD    | chr1:97770919  | A  | C  | nonsynonymous SNV    | p.V732G  | rs60511679  | 0.0001981 | 16.04 |
| DPYD    | chr1:97770920  | C  | T  | nonsynonymous SNV    | p.V732I  | rs1801160   | 0.04647   | 23.5  |

|         |                |       |   |                     |              |             |           |       |
|---------|----------------|-------|---|---------------------|--------------|-------------|-----------|-------|
| DPYD    | chr1:97847962  | G     | A | nonsynonymous SNV   | p.A654V      |             | NA        | 11.37 |
| DPYD    | chr1:97848017  | T     | G | nonsynonymous SNV   | p.I636L      | rs55971861  | 0.0001483 | 12    |
| DPYD    | chr1:97915655  | C     | T | nonsynonymous SNV   | p.C622Y      | rs201433243 | 8.24E-05  | 16.67 |
| DPYD    | chr1:97981395  | T     | C | nonsynonymous SNV   | p.I543V      | rs1801159   | 0.193     | 12.85 |
| DPYD    | chr1:97981407  | C     | T | nonsynonymous SNV   | p.G539R      | rs142619737 | 0.0002568 | 18.57 |
| DPYD    | chr1:97981421  | C     | T | nonsynonymous SNV   | p.S534N      | rs1801158   | 0.01416   | 18.66 |
| DPYD    | chr1:98015193  | C     | T | nonsynonymous SNV   | p.V483I      | rs141439344 | 8.25E-05  | 6.853 |
| DPYD    | chr1:98015282  | G     | C | nonsynonymous SNV   | p.P453R      | rs144395748 | 0.0001268 | 23.4  |
| DPYD    | chr1:98039437  | C     | T | nonsynonymous SNV   | p.M406I      | rs61622928  | 0.006046  | 10.26 |
| DPYD    | chr1:98144726  | T     | C | nonsynonymous SNV   | p.K259E      | rs45589337  | 0.01022   | 14.46 |
| DPYD    | chr1:98164983  | A     | T | nonsynonymous SNV   | p.C202S      |             | NA        | 25    |
| DPYD    | chr1:98165030  | T     | C | nonsynonymous SNV   | p.Y186C      | rs115232898 | 0.00234   | 18.78 |
| DPYD    | chr1:98165091  | T     | C | nonsynonymous SNV   | p.M166V      | rs2297595   | 0.08637   | 18.97 |
| DPYD    | chr1:98186465  | G     | C | nonsynonymous SNV   | p.F167L      | rs72977734  | 0.001666  | 11.22 |
| DPYD    | chr1:98187098  | T     | C | nonsynonymous SNV   | p.N151D      | rs200562975 | 0.001115  | 15.03 |
| DPYD    | chr1:98187190  | T     | C | nonsynonymous SNV   | p.N120S      |             | 8.28E-06  | 25.5  |
| DPYD    | chr1:98293683  | G     | A | stopgain SNV        | p.R74X       | rs189768576 | 0.0001077 | 35    |
| DPYD    | chr1:98293709  | G     | A | nonsynonymous SNV   | p.T65M       |             | 6.63E-05  | 17.6  |
| DPYD    | chr1:98386472  | G     | A | nonsynonymous SNV   | p.P3S        |             | 2.37E-05  | 11.67 |
| G6PD    | chrX:153760649 | C     | G | nonsynonymous SNV   | p.R439P      | rs137852337 | NA        | 24.3  |
| G6PD    | chrX:153761240 | A     | G | nonsynonymous SNV   | p.L323P      | rs76723693  | 0.0006526 | 12.79 |
| G6PD    | chrX:153761337 | C     | T | nonsynonymous SNV   | p.V291M      | rs137852327 | 0.0002542 | 18.56 |
| G6PD    | chrX:153763402 | C     | T | nonsynonymous SNV   | p.E156K      | rs137852313 | 0.0003083 | 0.012 |
| IFNL3   | chr19:39734325 | G     | A | nonsynonymous SNV   | p.R180C      | rs150748693 | 0.011     | 15.67 |
| IFNL3   | chr19:39734465 | T     | G | nonsynonymous SNV   | p.K164T      |             | NA        | 15.97 |
| IFNL3   | chr19:39734656 | G     | A | nonsynonymous SNV   | p.R134W      | rs139176035 | 0.0002313 | 7.516 |
| IFNL3   | chr19:39734673 | T     | C | nonsynonymous SNV   | p.H128R      | rs144005418 | 0.0002556 | 13.46 |
| IFNL3   | chr19:39734734 | T     | C | nonsynonymous SNV   | p.T108A      | rs148543092 | 0.006251  | 1.964 |
| IFNL3   | chr19:39734754 | G     | A | nonsynonymous SNV   | p.T101M      | rs145428712 | 0.001635  | 9.211 |
| IFNL3   | chr19:39734773 | C     | G | nonsynonymous SNV   | p.E95Q       | rs147679979 | 0.002381  | 10.53 |
| IFNL3   | chr19:39735517 | G     | A | nonsynonymous SNV   | p.L31F       | rs138893424 | 0.01256   | 9.03  |
| SLCO1B1 | chr12:21325668 | C     | T | nonsynonymous SNV   | p.R57W       | rs139257324 | 0.0001077 | 16.43 |
| SLCO1B1 | chr12:21325714 | G     | A | nonsynonymous SNV   | p.S72N       |             | 8.77E-06  | 17.4  |
| SLCO1B1 | chr12:21331554 | A     | G | nonsynonymous SNV   | p.M176V      |             | NA        | 0.132 |
| SLCO1B1 | chr12:21331860 | A     | G | nonsynonymous SNV   | p.I211M      | rs201722521 | 0.004007  | 14.53 |
| SLCO1B1 | chr12:21331891 | A     | G | nonsynonymous SNV   | p.I222V      | rs79135870  | 0.0009899 | 2.147 |
| SLCO1B1 | chr12:21349885 | A     | G | nonsynonymous SNV   | p.I245V      | rs11045852  | 0.007622  | 0.162 |
| SLCO1B1 | chr12:21349910 | G     | A | nonsynonymous SNV   | p.R253Q      | rs11045853  | 0.0004202 | 10.34 |
| SLCO1B1 | chr12:21355487 | T     | G | nonsynonymous SNV   | p.F400V      |             | NA        | 14.53 |
| SLCO1B1 | chr12:21355489 | C     | G | nonsynonymous SNV   | p.F400L      | rs59113707  | 0.004341  | 9.49  |
| SLCO1B1 | chr12:21355598 | G     | A | nonsynonymous SNV   | p.G437R      | rs142965323 | 0.0002003 | 14.27 |
| SLCO1B1 | chr12:21358965 | A     | G | nonsynonymous SNV   | p.I499V      | rs74064213  | 0.002482  | 1.35  |
| SLCO1B1 | chr12:21375289 | C     | T | stopgain SNV        | p.R580X      | rs71581941  | 0.001639  | 37    |
| SLCO1B1 | chr12:21391951 | CATCA | - | frameshift deletion | p.635_636del |             | NA        | NA    |
| SLCO1B1 | chr12:21392079 | C     | T | nonsynonymous SNV   | p.H678Y      | rs200995543 | 0.0002487 | 4.423 |
| SLCO1B1 | chr12:21392092 | C     | T | nonsynonymous SNV   | p.S682F      | rs140790673 | 0.0001077 | 5.851 |
| TPMT    | chr6:18130925  | T     | C | nonsynonymous SNV   | p.K238E      | rs150900439 | 2.48E-05  | 15.16 |
| TPMT    | chr6:18130960  | C     | T | nonsynonymous SNV   | p.R226Q      | rs139392616 | 4.13E-05  | 14.53 |
| TPMT    | chr6:18134078  | C     | A | nonsynonymous SNV   | p.Q179H      | rs6921269   | 0.001929  | 8.314 |
| UGT1A1  | chr2:234669058 | G     | A | nonsynonymous SNV   | p.S42N       |             | 2.48E-05  | 14.98 |
| UGT1A1  | chr2:234669094 | G     | T | nonsynonymous SNV   | p.G54V       |             | 8.24E-06  | 33    |
| UGT1A1  | chr2:234669144 | G     | A | nonsynonymous SNV   | p.G71R       | rs4148323   | 0.02066   | 12.79 |
| UGT1A1  | chr2:234669256 | G     | A | nonsynonymous SNV   | p.R108H      |             | NA        | 15.4  |
| UGT1A1  | chr2:234669259 | T     | C | nonsynonymous SNV   | p.V109A      | rs144217005 | 0.0002969 | 14.38 |
| UGT1A1  | chr2:234669405 | C     | T | nonsynonymous SNV   | p.P158S      |             | NA        | 8.91  |

|               |                |   |   |                   |         |             |           |       |
|---------------|----------------|---|---|-------------------|---------|-------------|-----------|-------|
| <i>UGT1A1</i> | chr2:234669681 | T | C | nonsynonymous SNV | p.S250P | rs57307513  | 0.0002718 | 9.383 |
| <i>VKORC1</i> | chr16:31102589 | G | A | nonsynonymous SNV | p.P83L  | rs7200749   | 0.01909   | 21.4  |
| <i>VKORC1</i> | chr16:31104714 | G | A | nonsynonymous SNV | p.H68Y  | rs145273772 | 0.0004706 | 6.188 |
| <i>VKORC1</i> | chr16:31105945 | C | A | nonsynonymous SNV | p.D36Y  | rs61742245  | 0.002159  | 17.49 |



Supplemental Table 6B. Coding variants discovered by WGS that were not included among CPIC important variants.

| Gene refGene | chr.pos        | Ref | Alt | ExonicFunc.refGene  | AA Change | snp138      | ExAC.maf  | CADD Score |
|--------------|----------------|-----|-----|---------------------|-----------|-------------|-----------|------------|
| CFTR         | chr7:117144344 | C   | T   | nonsynonymous SNV   | p.R31C    | rs1800073   | 0.001679  | 25.6       |
| CFTR         | chr7:117149143 | C   | T   | nonsynonymous SNV   | p.R74W    | rs115545701 | 0.001723  | 19.66      |
| CFTR         | chr7:117149144 | G   | A   | nonsynonymous SNV   | p.R74Q    | rs142540482 | 0.0001897 | 15.06      |
| CFTR         | chr7:117149147 | G   | A   | nonsynonymous SNV   | p.R75Q    | rs1800076   | 0.01536   | 34         |
| CFTR         | chr7:117171029 | G   | A   | nonsynonymous SNV   | p.R117H   | rs78655421  | 0.001537  | 22.4       |
| CFTR         | chr7:117171122 | T   | C   | nonsynonymous SNV   | p.I148T   | rs35516286  | 0.001871  | 25         |
| CFTR         | chr7:117180174 | G   | A   | nonsynonymous SNV   | p.R297Q   | rs143486492 | 0.0004948 | 20.8       |
| CFTR         | chr7:117188736 | C   | A   | nonsynonymous SNV   | p.N417K   | rs4727853   | NA        | 0.059      |
| CFTR         | chr7:117188750 | C   | T   | nonsynonymous SNV   | p.S422F   | rs201880593 | NA        | 3.962      |
| CFTR         | chr7:117188797 | A   | G   | nonsynonymous SNV   | p.T438A   | rs201434579 | NA        | 10.88      |
| CFTR         | chr7:117188877 | G   | T   | nonsynonymous SNV   | p.K464N   |             | NA        | 18.01      |
| CFTR         | chr7:117199533 | G   | A   | nonsynonymous SNV   | p.V470M   | rs213950    | 0.4829    | 2.095      |
| CFTR         | chr7:117250575 | G   | C   | nonsynonymous SNV   | p.L997F   | rs1800111   | 0.002104  | 16.06      |
| CFTR         | chr7:117267812 | T   | G   | nonsynonymous SNV   | p.S1235R  | rs34911792  | 0.004992  | 12.5       |
| CFTR         | chr7:117282582 | G   | A   | nonsynonymous SNV   | p.D1270N  | rs11971167  | 0.001463  | 33         |
| CYP2C19      | chr10:96534922 | G   | C   | nonsynonymous SNV   | p.E92D    | rs17878459  | 0.0236    | 2.054      |
| CYP2C19      | chr10:96535264 | G   | A   | nonsynonymous SNV   | p.R150H   | rs58973490  | 0.002652  | 4.412      |
| CYP2C19      | chr10:96602623 | G   | A   | nonsynonymous SNV   | p.V331I   | rs3758581   | 0.06242   | 0.001      |
| CYP2C19      | chr10:96602635 | C   | T   | nonsynonymous SNV   | p.R335W   |             | 4.94E-05  | 13.06      |
| CYP2C19      | chr10:96602674 | A   | T   | nonsynonymous SNV   | p.T348S   |             | 8.24E-06  | 17.02      |
| CYP2C19      | chr10:96609752 | C   | T   | nonsynonymous SNV   | p.R410C   | rs17879685  | 0.001517  | 4.573      |
| CYP2C9       | chr10:96708974 | A   | G   | nonsynonymous SNV   | p.H251R   | rs2256871   | 0.006715  | 23.9       |
| CYP2C9       | chr10:96740948 | CA  | C   | frameshift deletion | p.Q324fs  |             | 3.30E-05  | NA         |
| CYP2D6       | chr22:42522698 | T   | C   | nonsynonymous SNV   | p.T407A   | rs375715419 | NA        | 16.55      |
| CYP2D6       | chr22:42523505 | C   | T   | nonsynonymous SNV   | p.G322S   | rs150552908 | NA        | 11.82      |
| CYP2D6       | chr22:42523514 | C   | T   | nonsynonymous SNV   | p.V319I   | rs61745683  | NA        | 6.769      |
| CYP2D6       | chr22:42523528 | C   | T   | nonsynonymous SNV   | p.R314H   | rs1058172   | 0.1211    | 34         |
| CYP2D6       | chr22:42523597 | A   | G   | nonsynonymous SNV   | p.V291A   |             | NA        | 3.038      |
| CYP2D6       | chr22:42523613 | C   | T   | nonsynonymous SNV   | p.D286N   | rs78209835  | 0.003382  | 13.7       |
| CYP2D6       | chr22:42523636 | C   | A   | nonsynonymous SNV   | p.R278L   | rs3915951   | NA        | 14.89      |
| CYP2D6       | chr22:42524219 | G   | T   | nonsynonymous SNV   | p.P216H   | rs148769737 | 0.0002567 | 14.57      |
| CYP2D6       | chr22:42524310 | C   | A   | nonsynonymous SNV   | p.A186S   | rs28371717  | 0.00754   | 11.43      |
| CYP2D6       | chr22:42524316 | C   | T   | nonsynonymous SNV   | p.A184T   |             | NA        | 13.98      |
| CYP2D6       | chr22:42524327 | A   | G   | nonsynonymous SNV   | p.L180P   | rs17002853  | 0.0002071 | 12.07      |
| CYP2D6       | chr22:42524817 | C   | T   | nonsynonymous SNV   | p.G161E   | rs139779104 | 0.007325  | 3.567      |
| CYP2D6       | chr22:42524838 | A   | G   | nonsynonymous SNV   | p.L154P   |             | NA        | 17.12      |

|                |                |    |   |                     |          |             |           |       |
|----------------|----------------|----|---|---------------------|----------|-------------|-----------|-------|
| <i>CYP2D6</i>  | chr22:42525077 | C  | T | nonsynonymous SNV   | p.E155K  | rs28371710  | 0.003873  | 10.34 |
| <i>CYP2D6</i>  | chr22:42525089 | G  | C | nonsynonymous SNV   | p.Q151E  | rs78482768  | 0.002392  | 0.009 |
| <i>CYP2D6</i>  | chr22:42525811 | T  | C | nonsynonymous SNV   | p.H94R   | rs28371704  | NA        | 0.424 |
| <i>CYP2D6</i>  | chr22:42525821 | G  | T | nonsynonymous SNV   | p.L91M   | rs28371703  | NA        | 14.36 |
| <i>CYP2D6</i>  | chr22:42526717 | C  | T | nonsynonymous SNV   | p.R26H   | rs28371696  | 0.003407  | 14.41 |
| <i>CYP2D6</i>  | chr22:42526763 | C  | T | nonsynonymous SNV   | p.V11M   | rs72552262  | 0.05301   | 3.418 |
| <i>CYP2D6</i>  | chr22:42526775 | C  | T | nonsynonymous SNV   | p.V7M    | rs72549358  | 0.00328   | 1.817 |
| <i>CYP3A5</i>  | chr7:99247736  | AC | A | frameshift deletion | p.V458fs |             | 0.00117   | NA    |
| <i>CYP3A5</i>  | chr7:99269397  | T  | C | stoploss SNV        | p.X141W  | rs6977165   | 0.04571   | 0.019 |
| <i>DPYD</i>    | chr1:97544543  | G  | T | nonsynonymous SNV   | p.P1023T | rs114096998 | 0.003428  | 13.21 |
| <i>DPYD</i>    | chr1:97770920  | C  | T | nonsynonymous SNV   | p.V732I  | rs1801160   | 0.04647   | 23.5  |
| <i>DPYD</i>    | chr1:97848017  | T  | G | nonsynonymous SNV   | p.I636L  | rs55971861  | 0.0001483 | 12    |
| <i>DPYD</i>    | chr1:97981395  | T  | C | nonsynonymous SNV   | p.I543V  | rs1801159   | 0.193     | 12.85 |
| <i>DPYD</i>    | chr1:97981421  | C  | T | nonsynonymous SNV   | p.S534N  | rs1801158   | 0.01416   | 18.66 |
| <i>DPYD</i>    | chr1:98165030  | T  | C | nonsynonymous SNV   | p.Y186C  | rs115232898 | 0.00234   | 18.78 |
| <i>DPYD</i>    | chr1:98165091  | T  | C | nonsynonymous SNV   | p.M166V  | rs2297595   | 0.08637   | 18.97 |
| <i>G6PD</i>    | chrX:153762615 | G  | C | nonsynonymous SNV   | p.D224E  | rs145247580 | 0.0004003 | 9.442 |
| <i>IFNL3</i>   | chr19:39734325 | G  | A | nonsynonymous SNV   | p.R180C  | rs150748693 | 0.011     | 15.67 |
| <i>IFNL3</i>   | chr19:39734352 | C  | T | nonsynonymous SNV   | p.E171K  | rs62120527  | NA        | 15.48 |
| <i>IFNL3</i>   | chr19:39734490 | G  | A | nonsynonymous SNV   | p.H156Y  | rs139076671 | NA        | 17.47 |
| <i>IFNL3</i>   | chr19:39735106 | T  | C | nonsynonymous SNV   | p.K70R   | rs8103142   | 0.2787    | 3.478 |
| <i>IFNL3</i>   | chr19:39735127 | G  | A | nonsynonymous SNV   | p.S63L   | rs140585624 | 0.0002665 | 14.46 |
| <i>IFNL3</i>   | chr19:39735517 | G  | A | nonsynonymous SNV   | p.L31F   | rs138893424 | 0.01256   | 9.03  |
| <i>IFNL3</i>   | chr19:39735520 | C  | A | nonsynonymous SNV   | p.A30S   |             | NA        | 8.855 |
| <i>IFNL3</i>   | chr19:39735549 | C  | G | nonsynonymous SNV   | p.G20A   | rs148017150 | 0.006512  | 11.73 |
| <i>SLCO1B1</i> | chr12:21355489 | C  | G | nonsynonymous SNV   | p.F400L  | rs59113707  | 0.004341  | 9.49  |
| <i>UGT1A1</i>  | chr2:234669144 | G  | A | nonsynonymous SNV   | p.G71R   | rs4148323   | 0.02066   | 12.79 |
| <i>UGT1A1</i>  | chr2:234669441 | T  | C | nonsynonymous SNV   | p.F170L  |             | NA        | 16.07 |
| <i>VKORC1</i>  | chr16:31102589 | G  | A | nonsynonymous SNV   | p.P83L   | rs7200749   | 0.01909   | 21.4  |
| <i>VKORC1</i>  | chr16:31104720 | C  | T | nonsynonymous SNV   | p.V66M   | rs72547529  | 0.0002643 | 32    |

Supplemental Table 7. Number of coding variations observed in exomes of unrelated individuals (n=60,706) in CPIC important genes as reported by ExAC database (<http://exac.broadinstitute.org/> version 0.3).

Listed are 12 CPIC important genes (excluding *HLA-B*) and all coding variants reported by ExAC, including CPIC important variants. Loss of function variants include “stop gained” and “frameshift” variants.

| Gene           | Base pairs of coding region | frameshift | inframe deletion | inframe insertion | initiat or codon | missense | splice acceptor | splice donor | stop gained | stop lost | Total | Total (loss of function variants) | Sum of MAF for Loss of function variants |
|----------------|-----------------------------|------------|------------------|-------------------|------------------|----------|-----------------|--------------|-------------|-----------|-------|-----------------------------------|------------------------------------------|
| <i>CFTR</i>    | 4443                        | 33         | 5                | 2                 | 2                | 688      | 11              | 11           | 35          |           | 787   | 68                                | 0.24%                                    |
| <i>CYP2C19</i> | 1473                        | 9          |                  |                   | 2                | 258      | 6               | 3            | 7           | 1         | 286   | 16                                | 0.58%                                    |
| <i>CYP2C9</i>  | 1473                        | 10         |                  |                   | 1                | 225      | 3               | 3            | 7           |           | 249   | 17                                | 0.11%                                    |
| <i>CYP2D6</i>  | 1494                        | 11         | 4                | 2                 |                  | 246      | 1               | 1            | 13          | 1         | 279   | 24                                | 2.30%                                    |
| <i>CYP3A5</i>  | 1509                        | 14         | 1                | 1                 | 1                | 157      | 3               | 4            | 12          | 2         | 195   | 26                                | 1.90%                                    |
| <i>DPYD</i>    | 3078                        | 13         |                  | 1                 | 1                | 393      | 5               | 8            | 11          |           | 432   | 24                                | 0.05%                                    |
| <i>G6PD</i>    | 1638                        | 1          |                  |                   |                  | 118      |                 | 1            | 2           |           | 122   | 3                                 | 0.05%                                    |
| <i>IFNL3</i>   | 1089                        | 1          | 1                |                   | 1                | 81       | 3               | 1            | 3           |           | 91    | 4                                 | 0.01%                                    |
| <i>SLCO1B1</i> | 591                         | 19         | 2                |                   | 2                | 278      | 1               | 10           | 16          |           | 328   | 35                                | 0.23%                                    |
| <i>TPMT</i>    | 2076                        | 1          |                  |                   | 1                | 81       | 4               | 1            | 4           |           | 92    | 5                                 | 0.02%                                    |
| <i>UGT1A1</i>  | 738                         | 36         | 6                |                   | 4                | 680      | 1               | 5            | 34          |           | 766   | 70                                | 0.54%                                    |
| <i>VKORC1</i>  | 864                         | 3          |                  |                   | 1                | 127      | 1               | 1            | 6           |           | 139   | 9                                 | 0.03%                                    |
| Total          |                             | 151        | 19               | 6                 | 16               | 3332     | 39              | 49           | 150         | 4         | 3766  | 301                               | 6.05%                                    |

Supplemental Figure 1

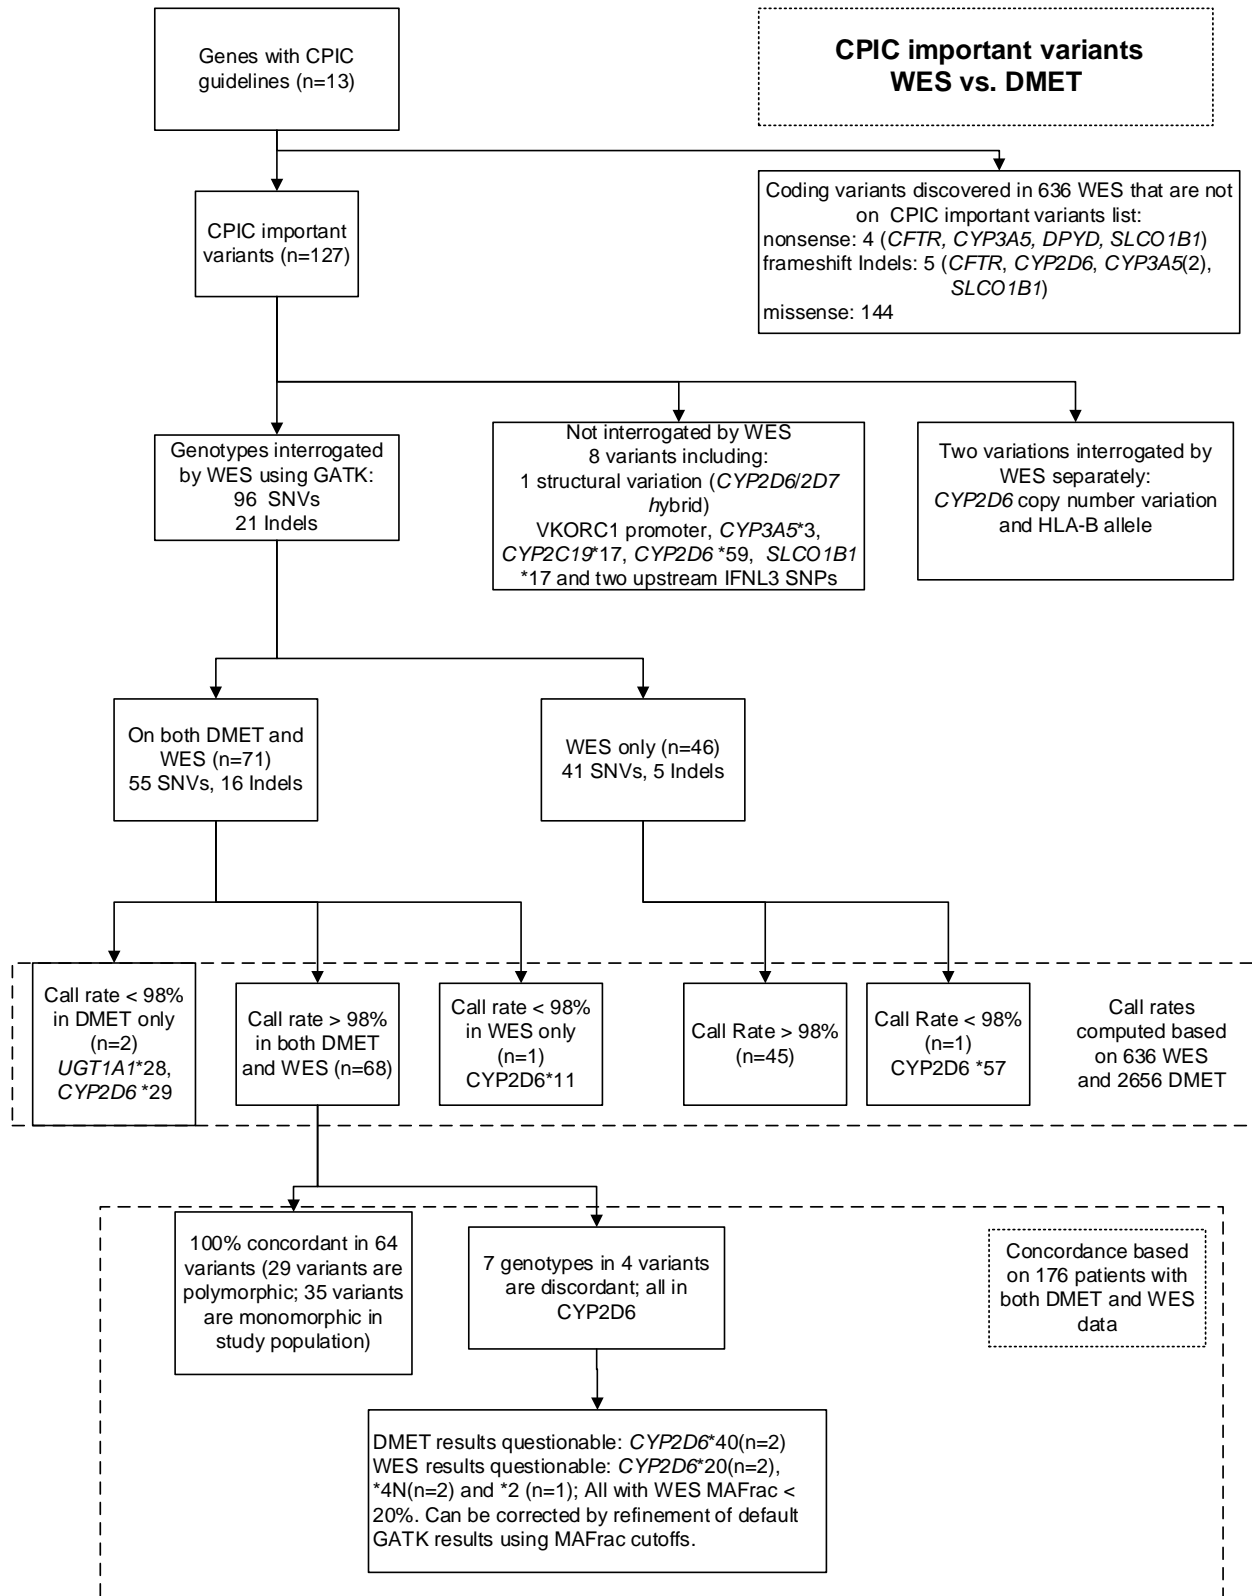

Supplemental Figure 2

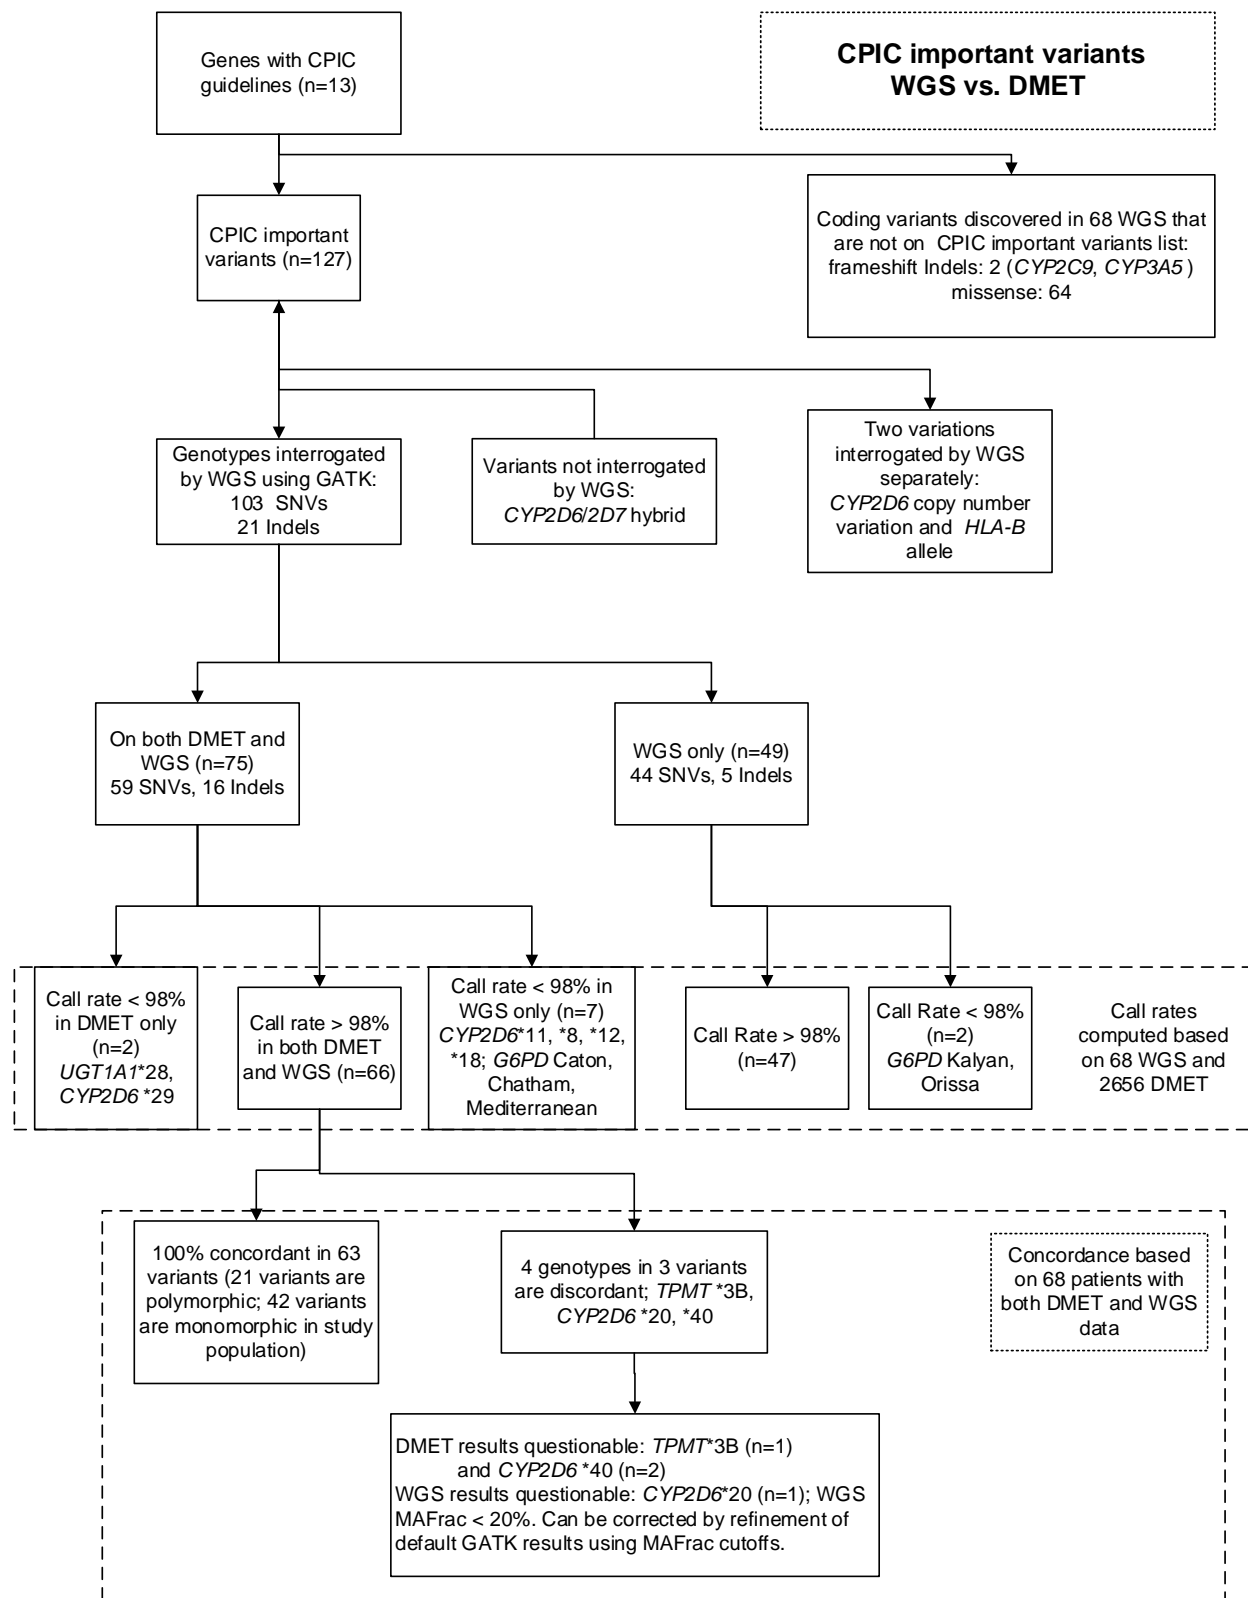



Supplemental Figure 4

A)

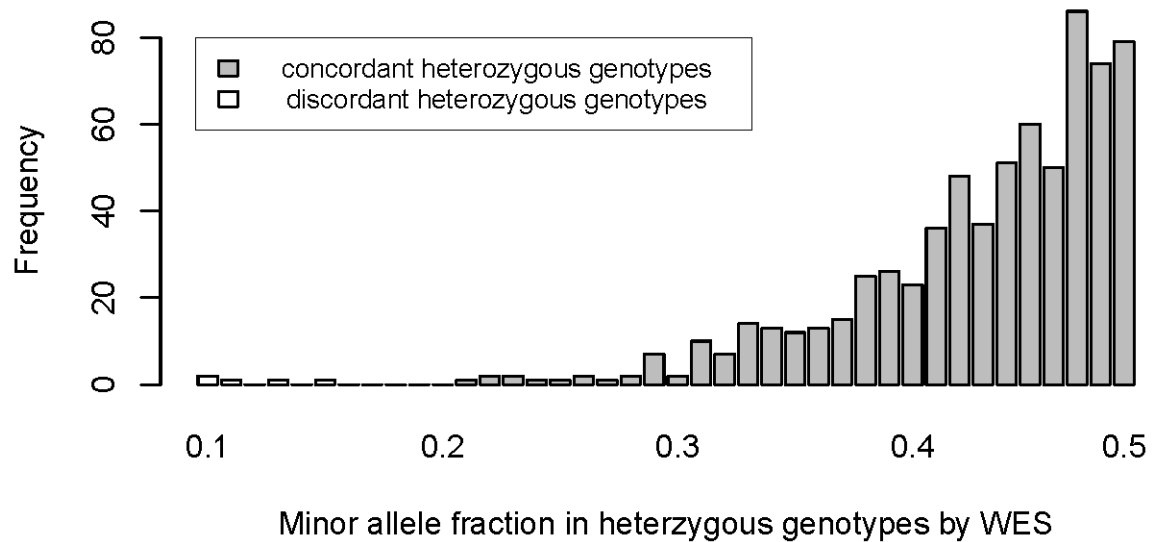

B)

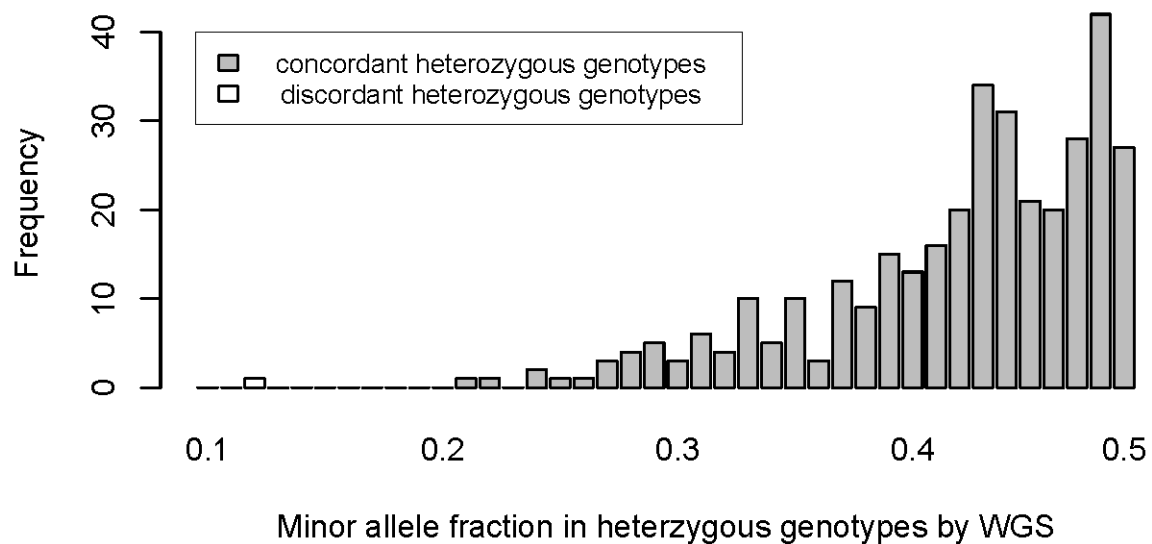

Supplemental Figure 5A

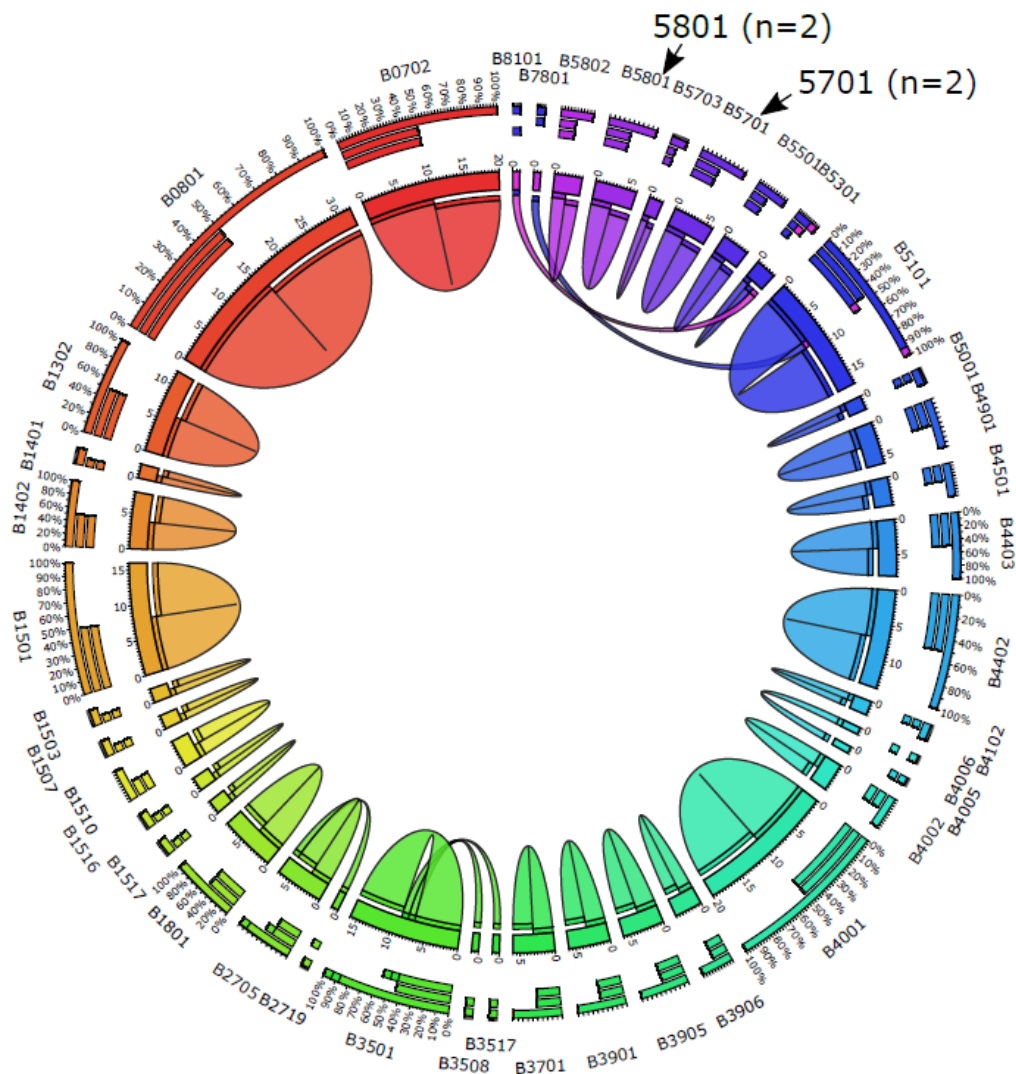



Supplemental Figure 5B

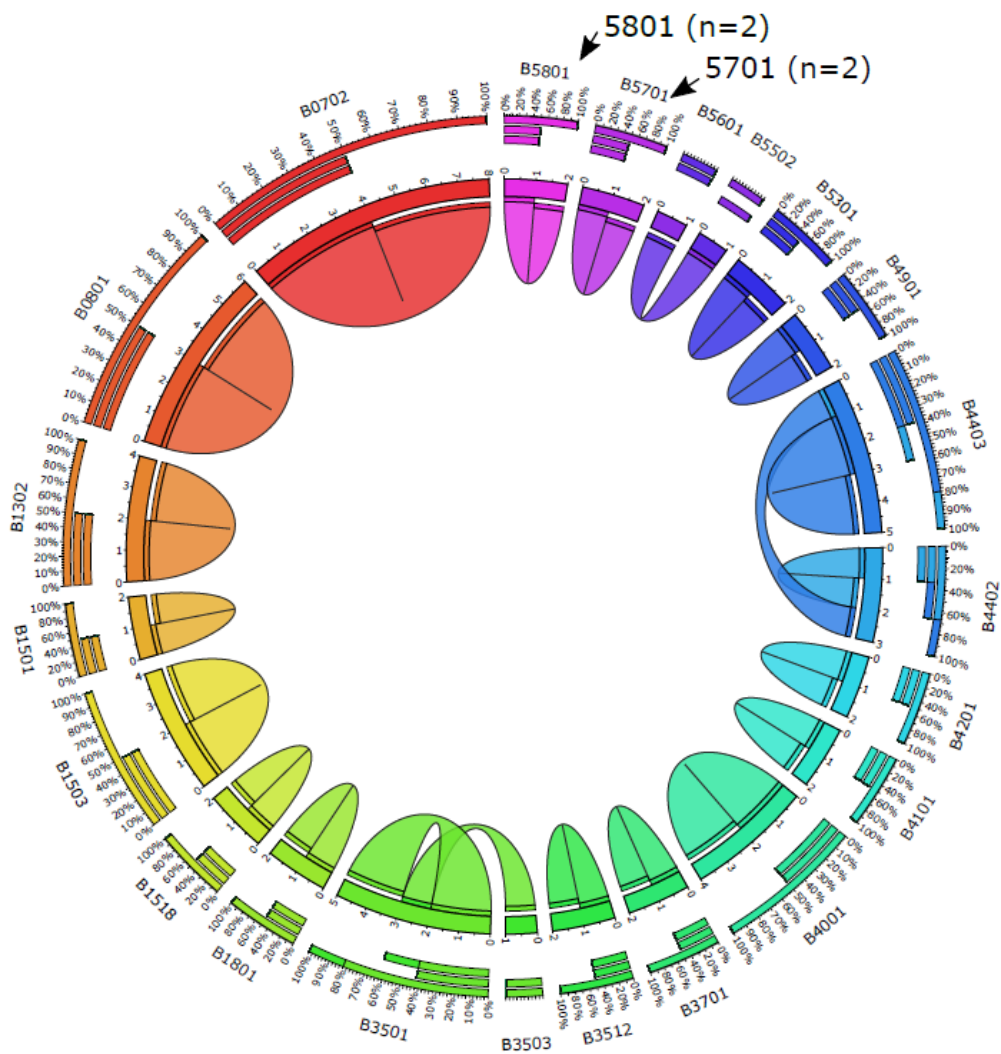

Supplemental Figure 6

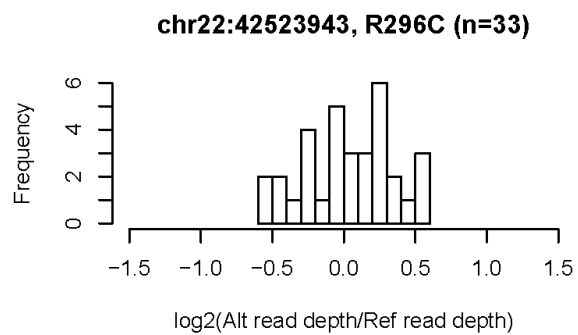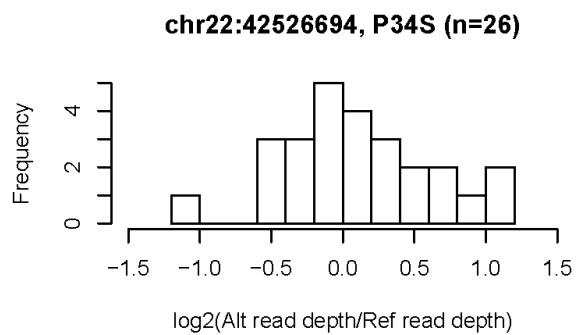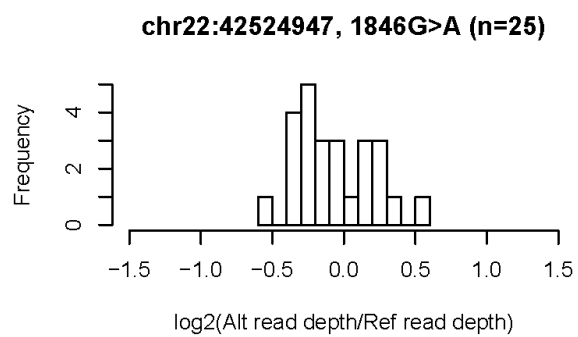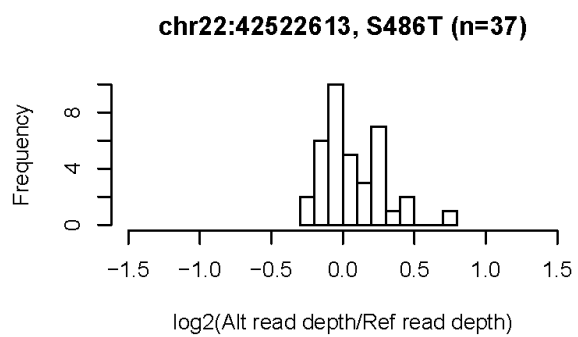

Supplemental Figure 7

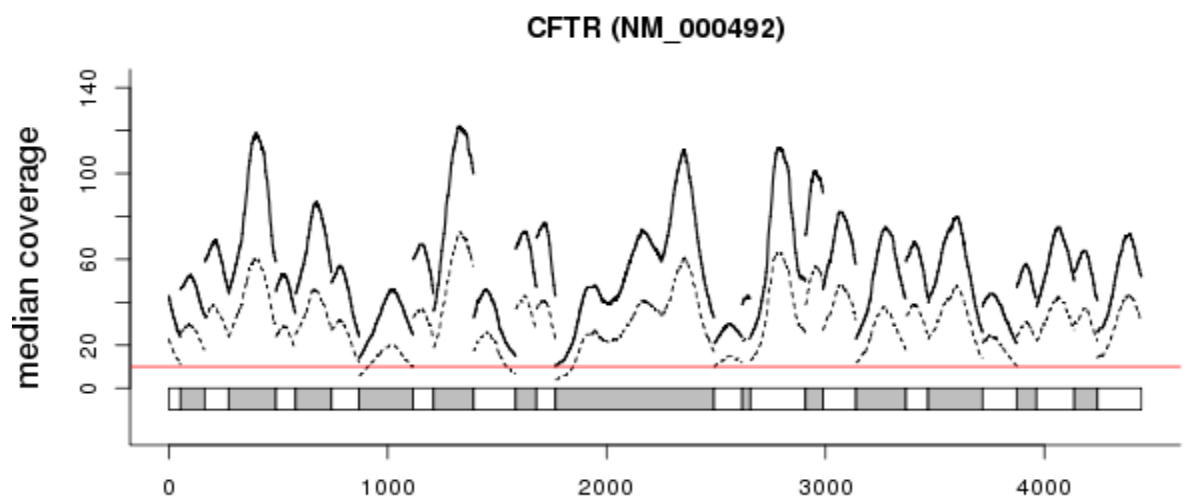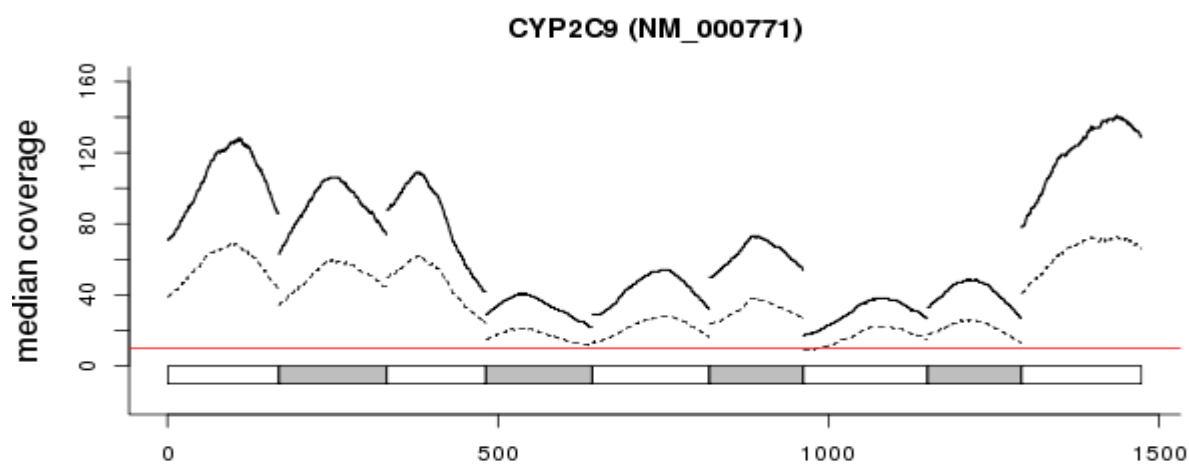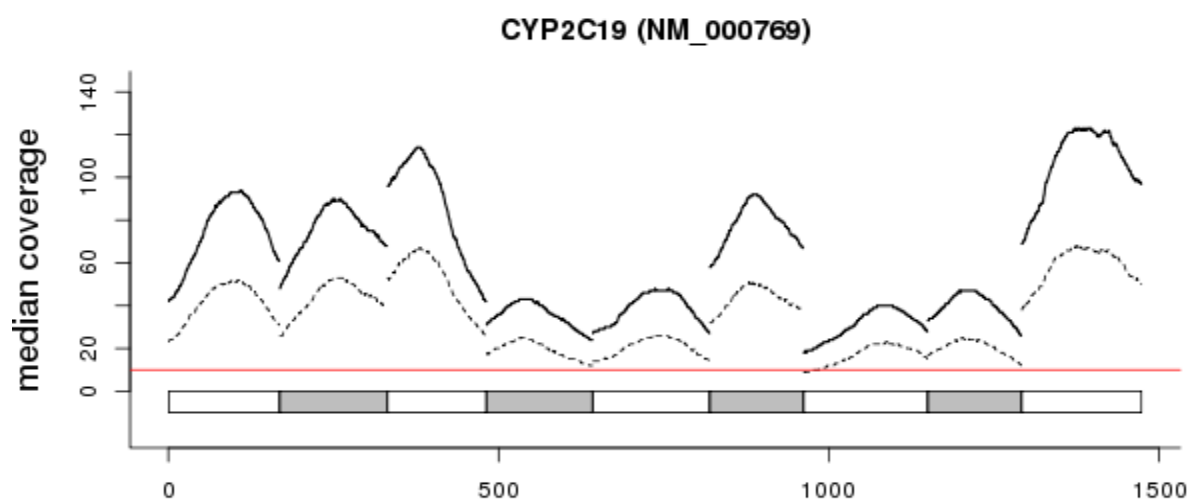

**CYP3A5 (NM\_000777)**

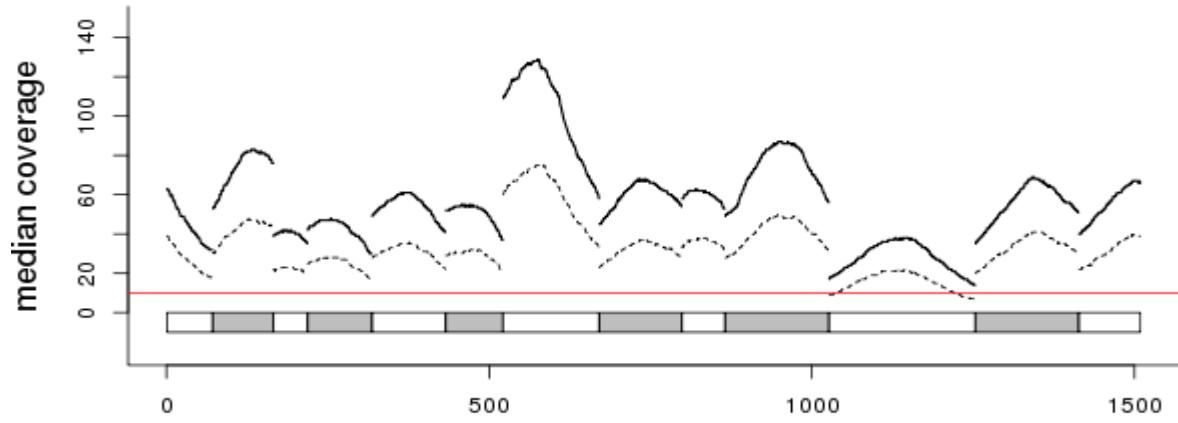

**CYP2D6 (NM\_000106)**

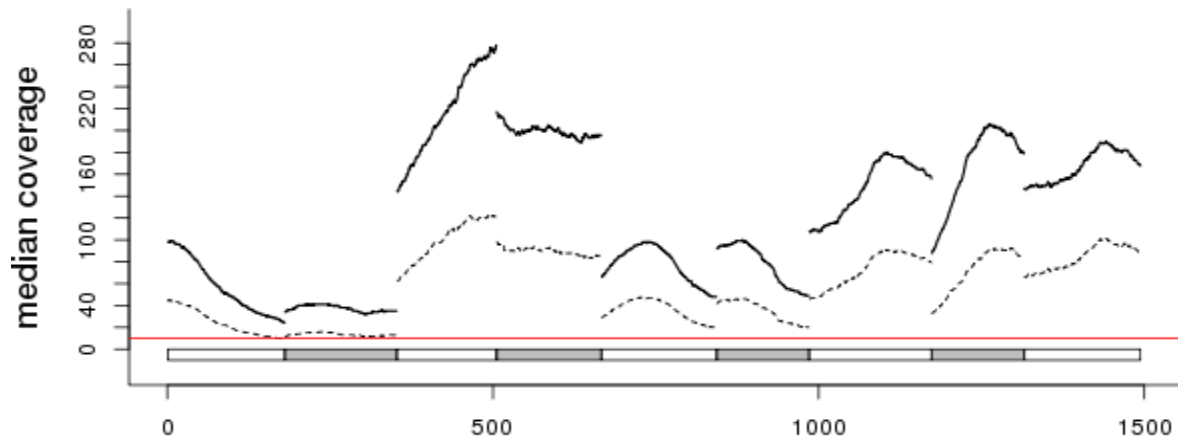

**DPYD (NM\_000110)**

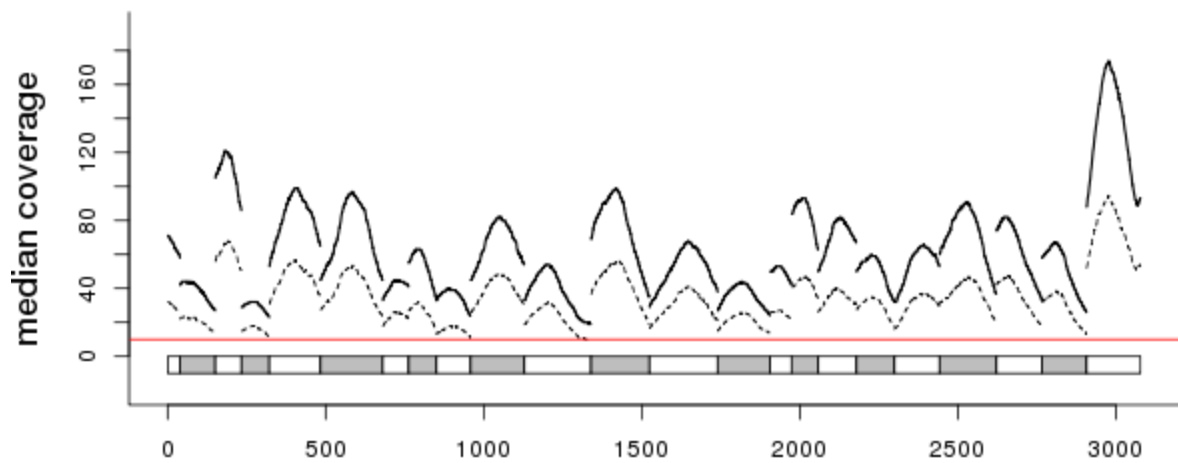

G6PD (NM\_000402)

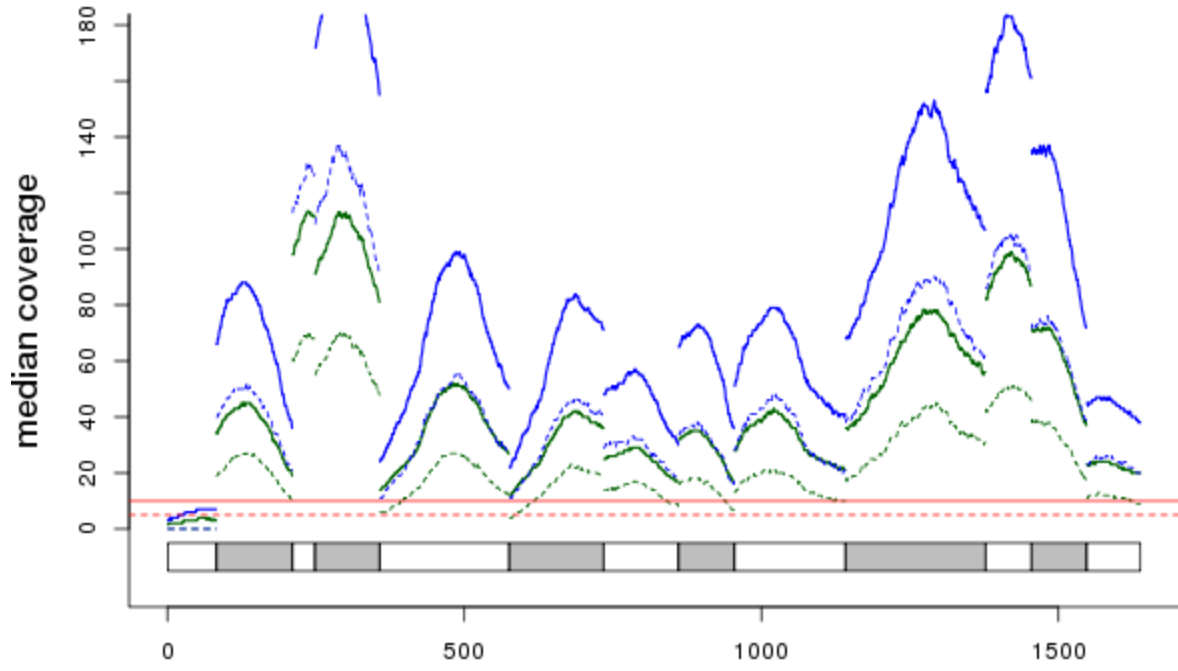

HLA-B (NM\_005514)

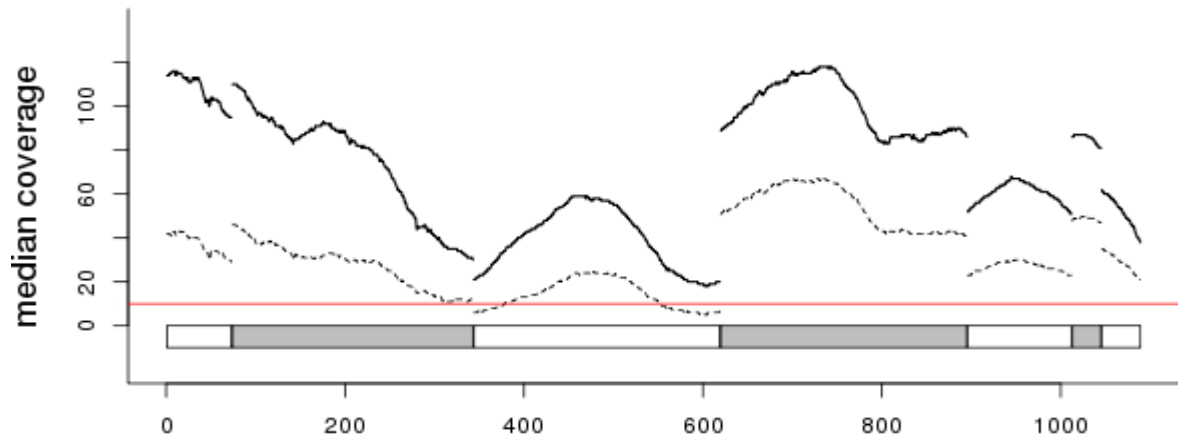

**IFNL3 (NM\_172139)**

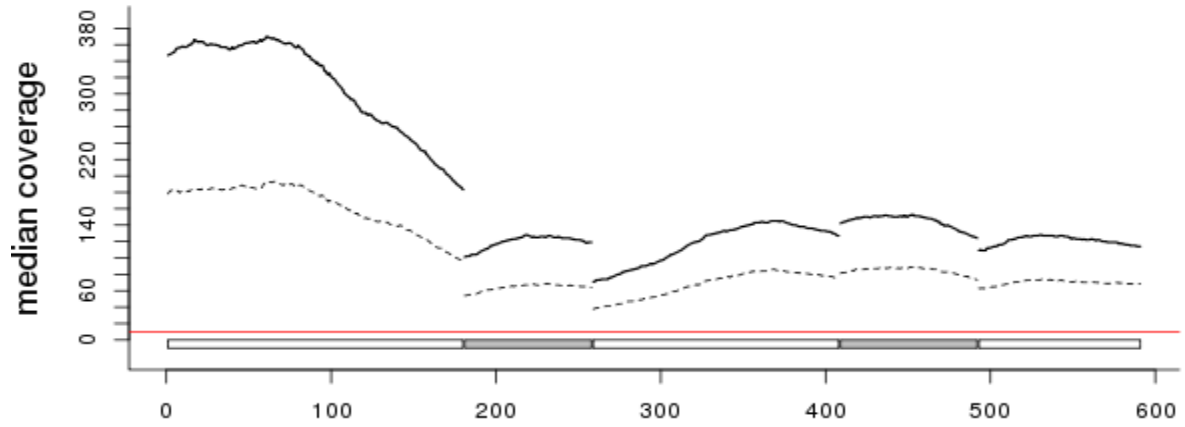

**SLCO1B1 (NM\_006446)**

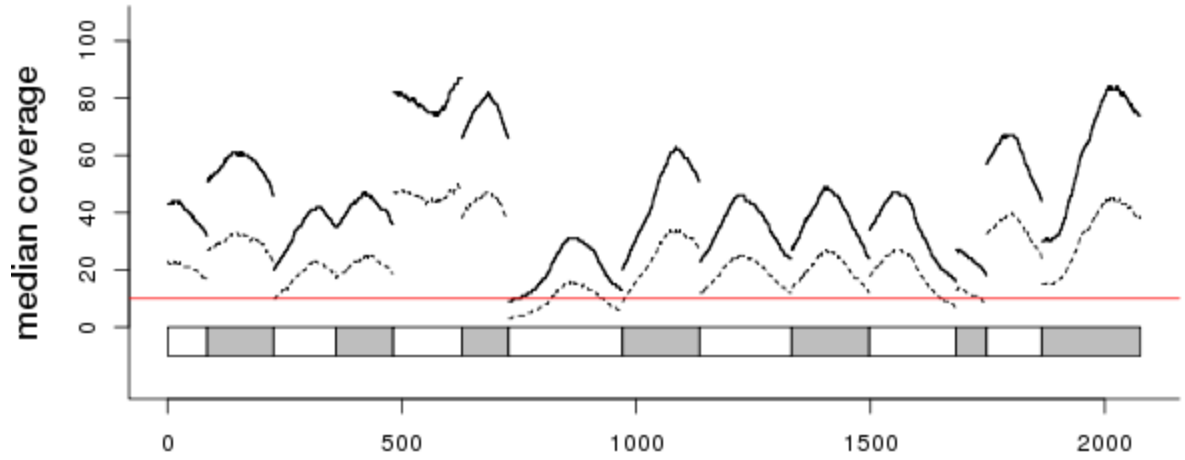

**TPMT (NM\_000367)**

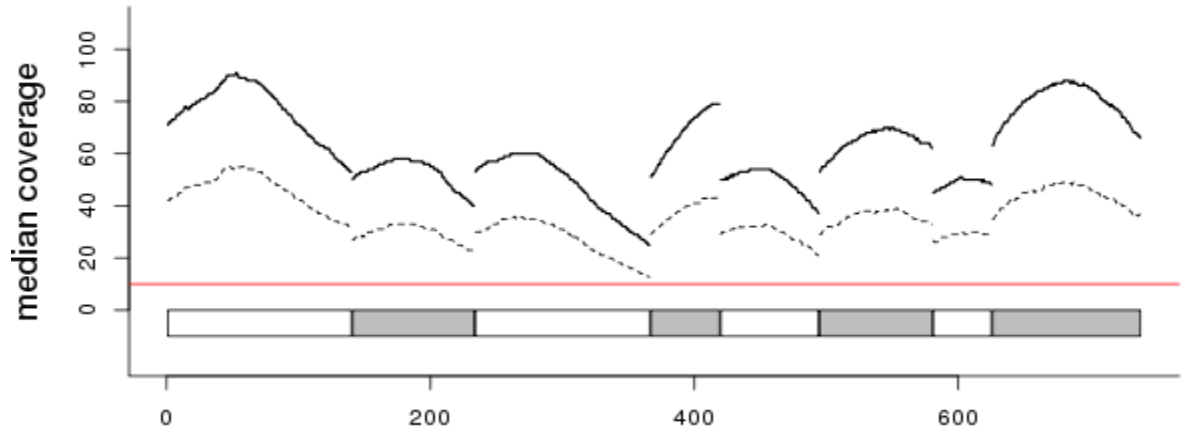

UGT1A1 (NM\_000463)

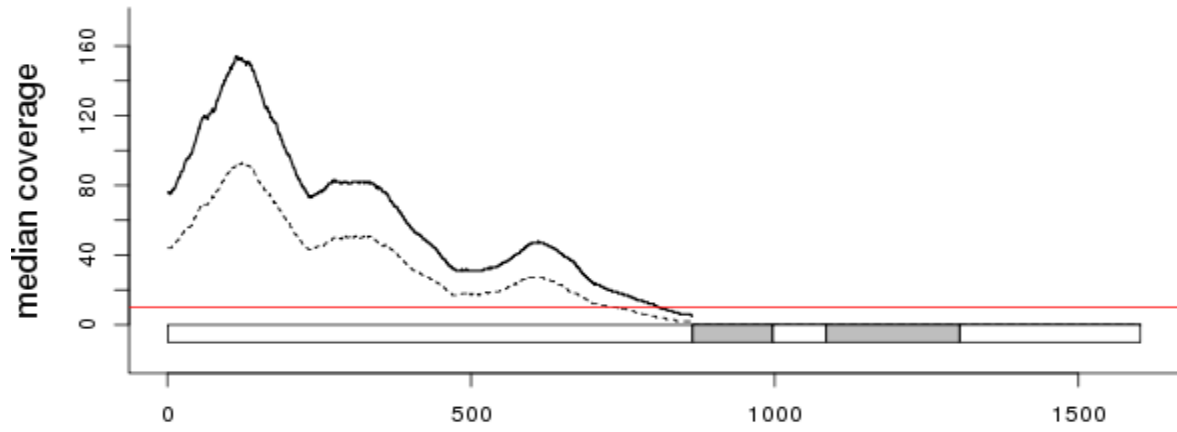

VKORC1 (NM\_024006)

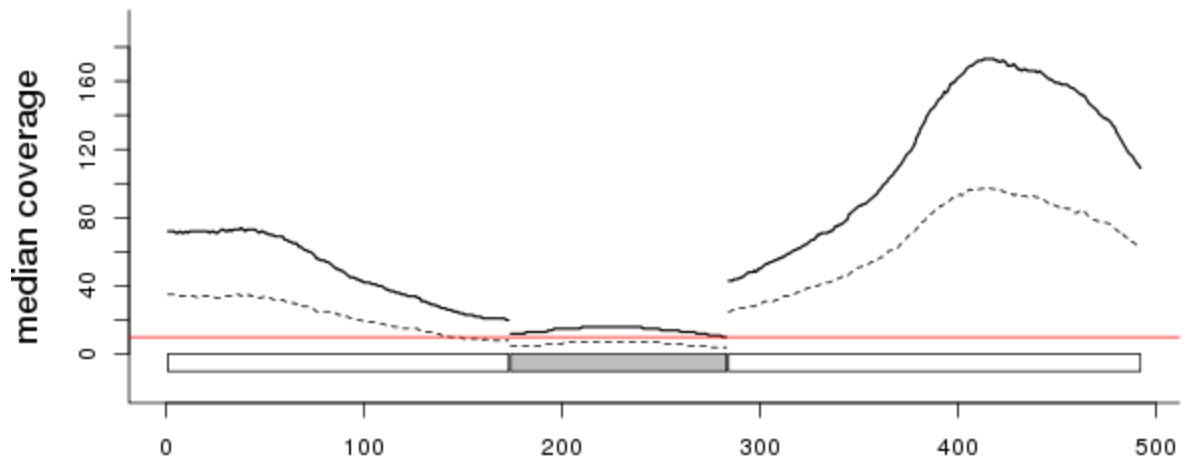

Supplemental Figure 8

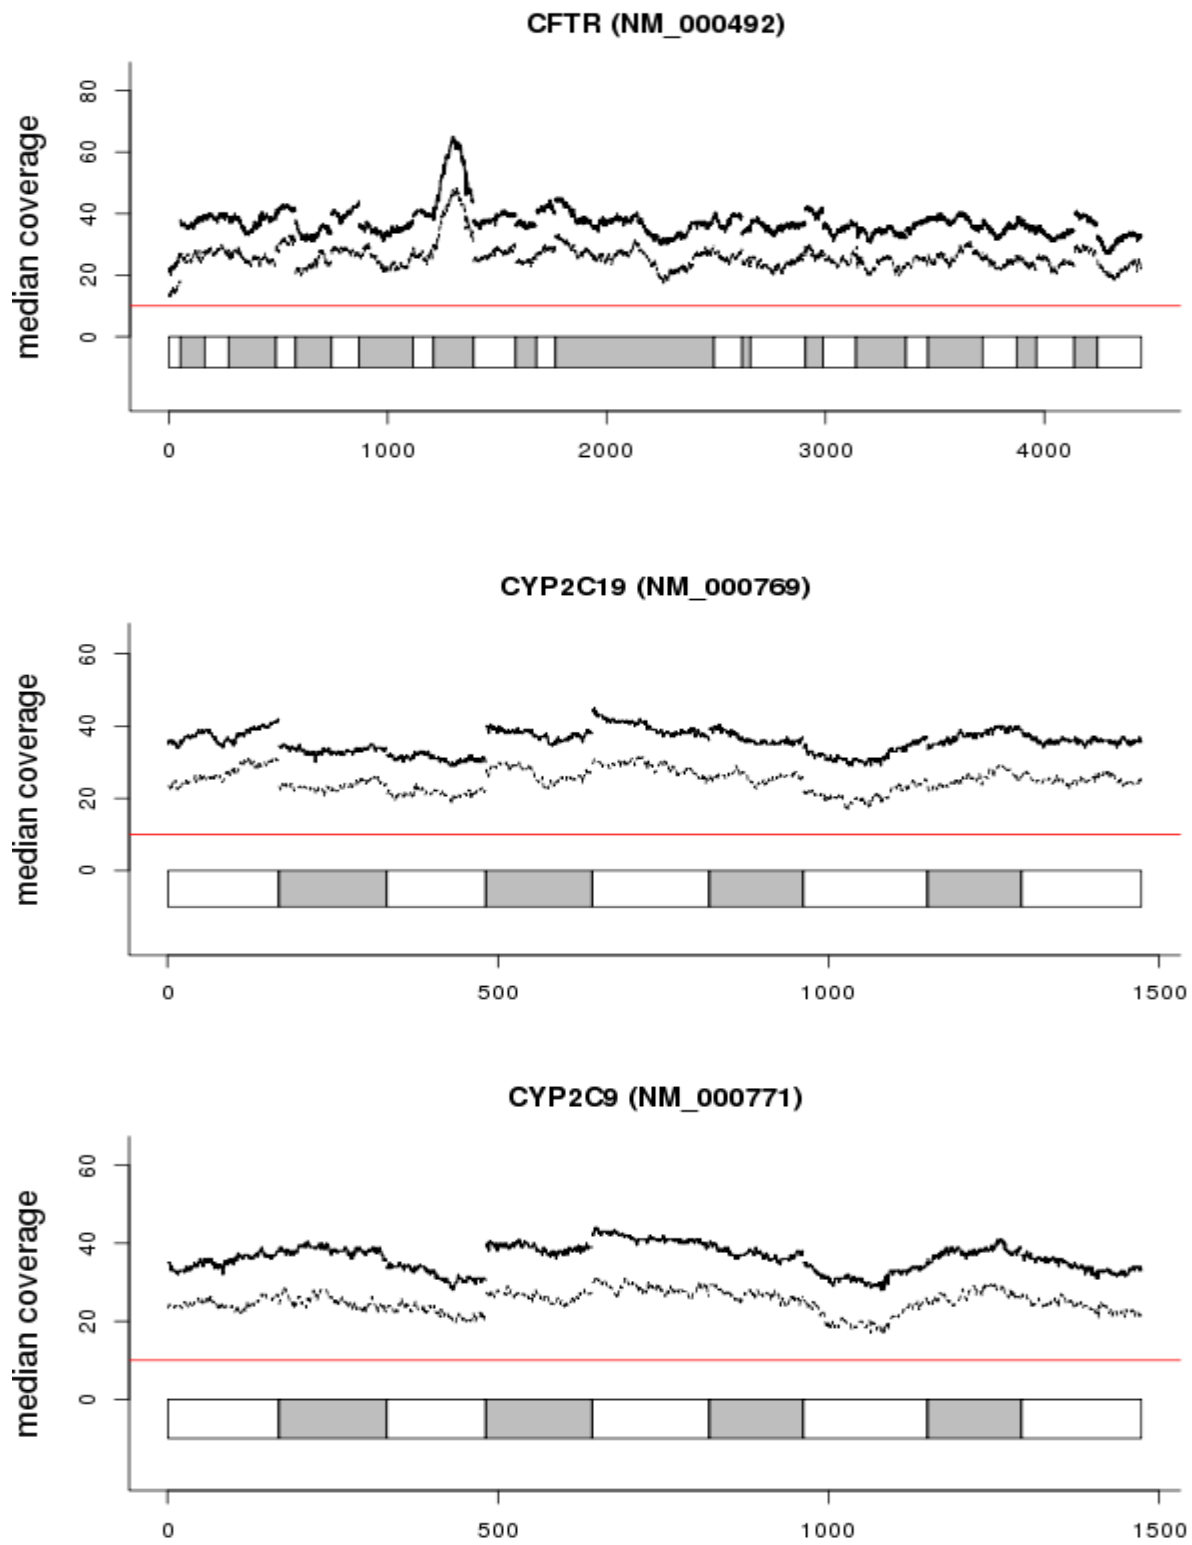



### CYP2D6 (NM\_000106)

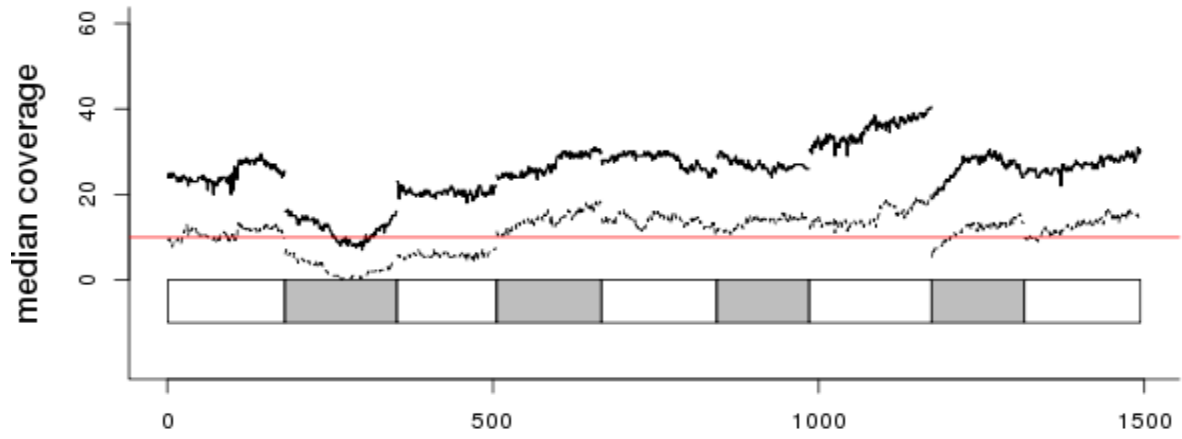

### CYP3A5 (NM\_000777)

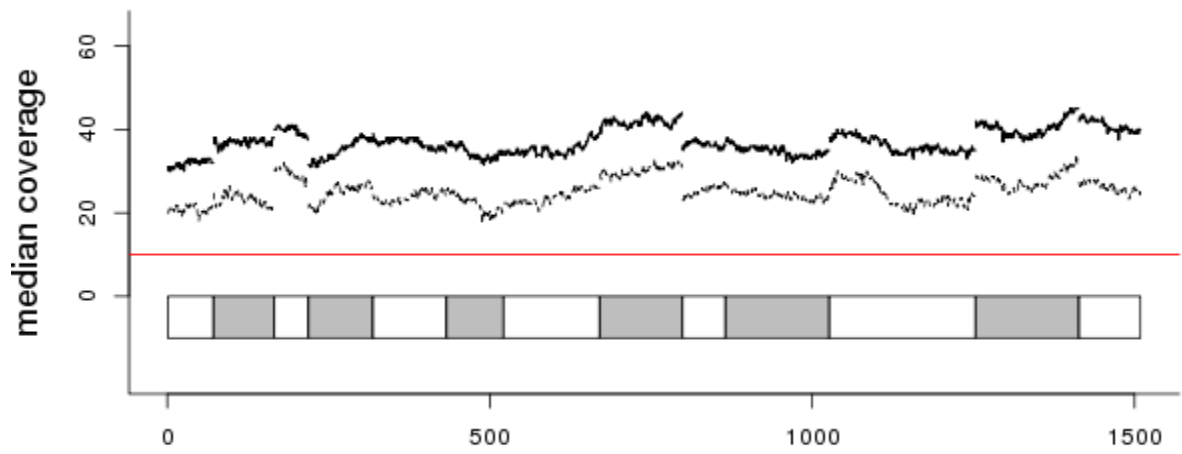

DPYD (NM\_000110)

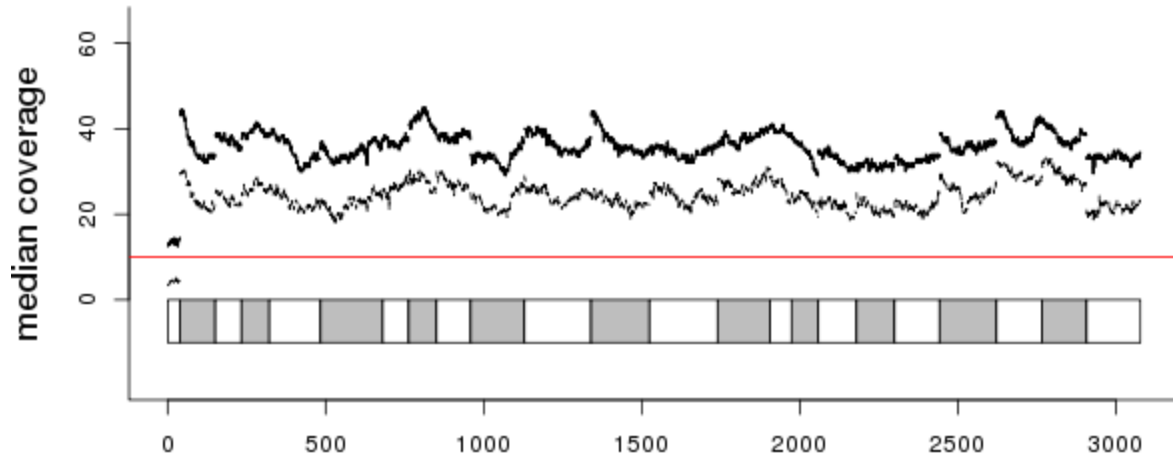

G6PD (NM\_000402)

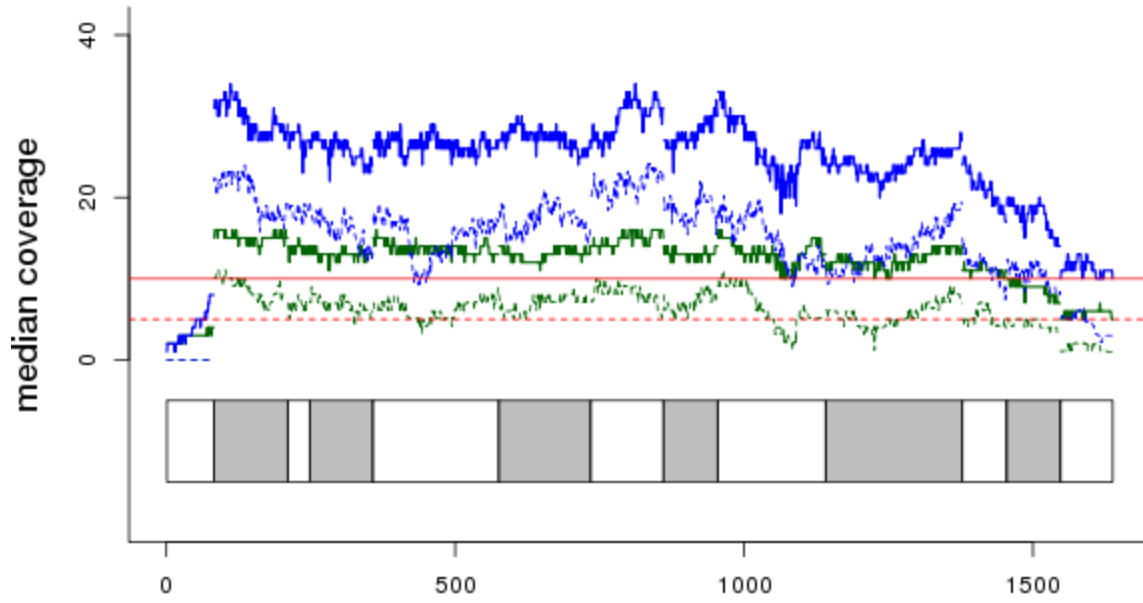

### HLA-B (NM\_005514)

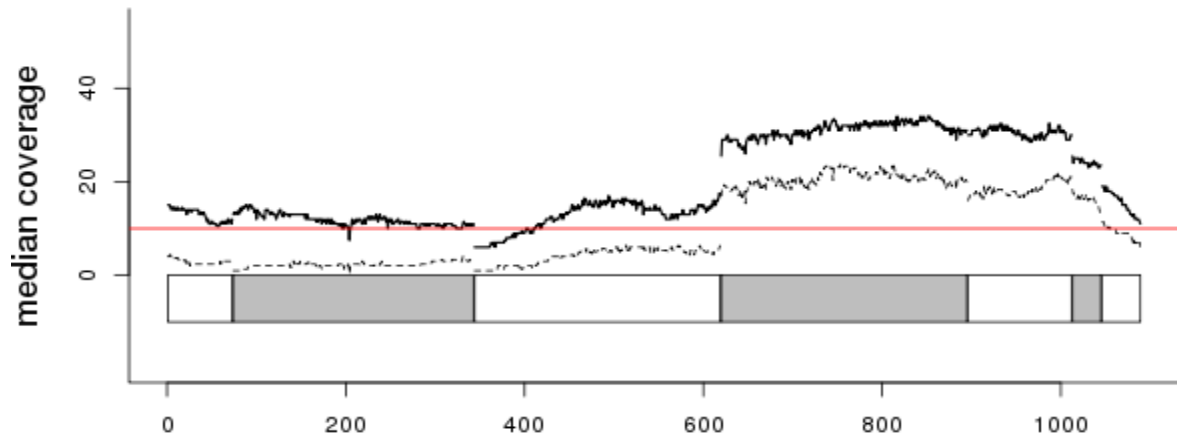

### IFNL3 (NM\_172139)

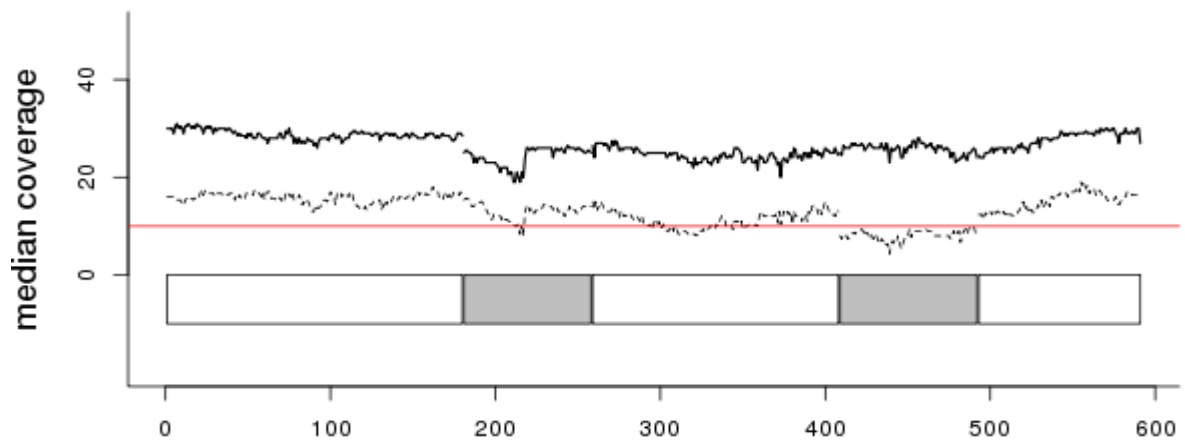

### SLCO1B1 (NM\_006446)

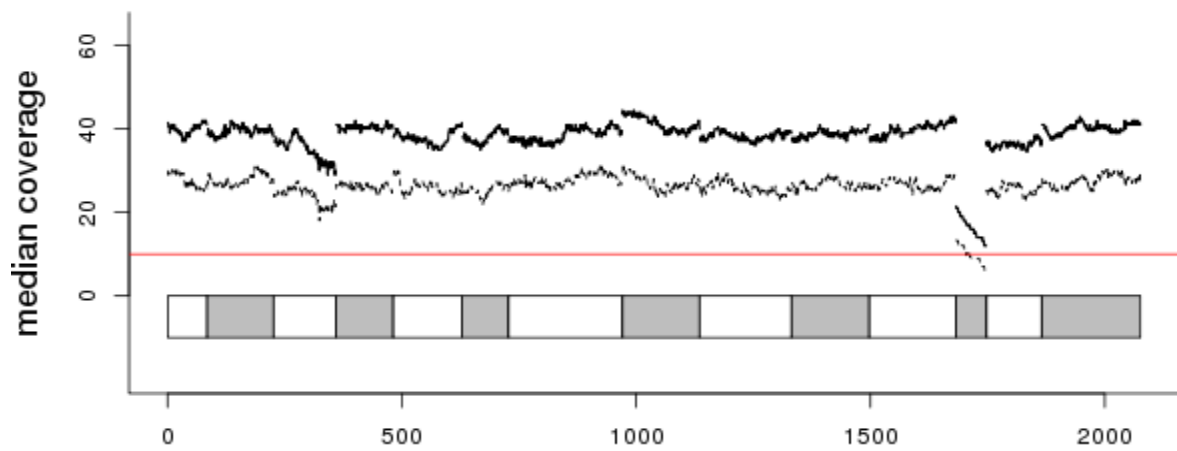

**UGT1A1 (NM\_000463)**

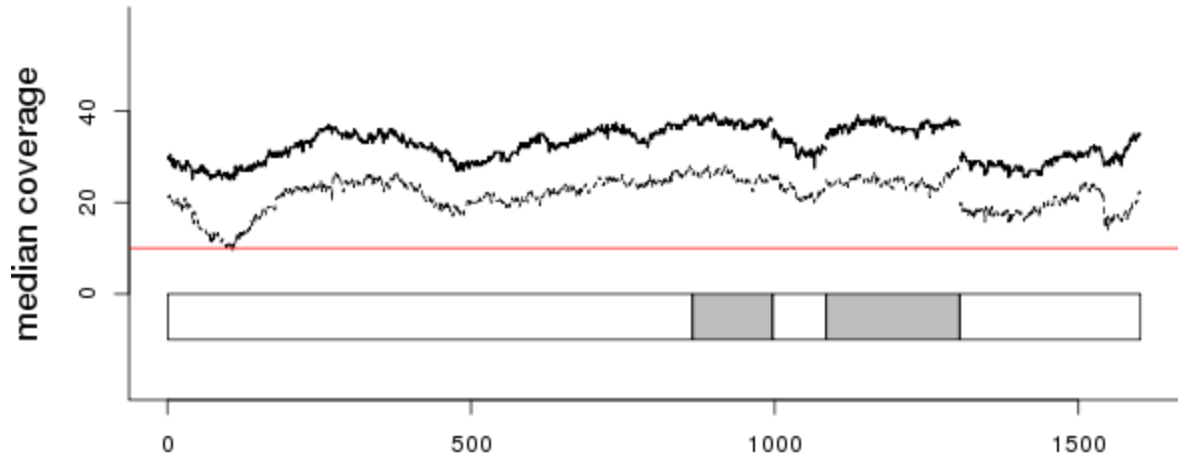

**VKORC1 (NM\_024006)**

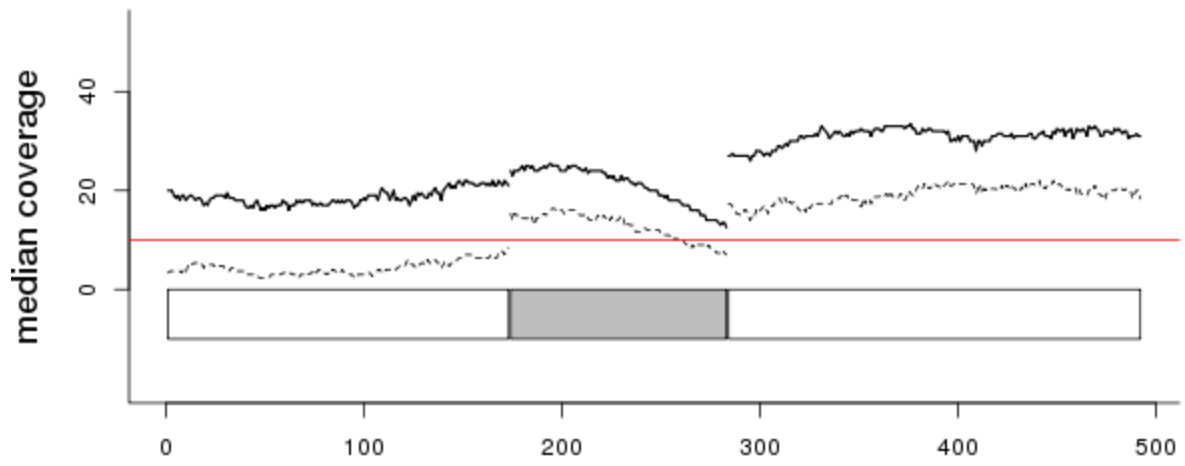

Supplemental Figure 9

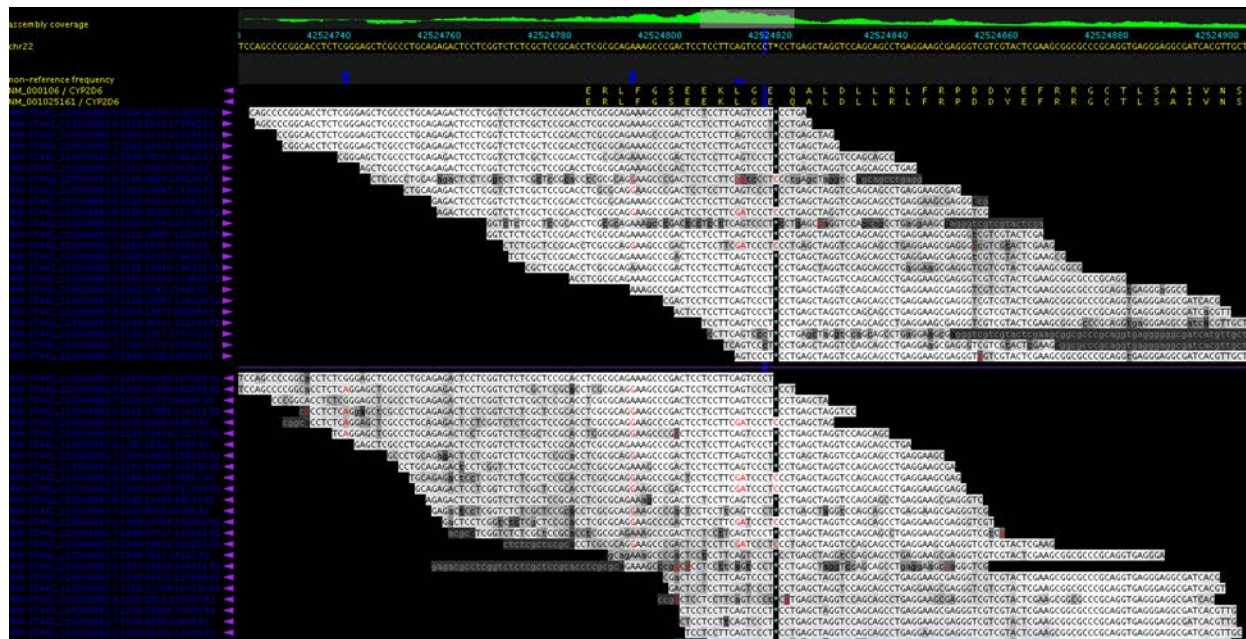

Supplement: NIHMS917280-supplement-Supp_Info.pdf [file NIHMS917280-supplement-Supp_Info.pdf]
